# Supplementary material for: Identification of Peptides and Their GPCRs in the Peppermint Shrimp Lysmata vittata, a Protandric Simultaneous Hermaphrodite Species
Source: Front Endocrinol (Lausanne). 2020 Apr 30;11:226. doi: 10.3389/fendo.2020.00226 (PMC7212414; doi:10.3389/fendo.2020.00226)
Supplement: Table S1 — Supplementary information. [file Table_1.XLSX]

## Sheet: Statistics 
Statistics for mRNA-sequencing and de novo assembly in L. vittata.
Sample	Trimdata statistics			Alignment statistics		Denovo Assembled statistics
	Total_Reads	Total_Bases	GC%	Mapped	Mapped	Total sequence num	Total sequence base	N50	Average
				Reads	Ratio
MP	50203730	7467792683	43.54	40408826	0.8049	71009	65718743	1687	925.5
EP	59414136	8802567215	45.03	47829260	0.805

## Sheet: peptide hormone seqeunces (bp)
Name	TPM_MP	TPM_EP	sequences (bp)
ACP1	0	1.89	CTTGAGAAACGAGCTCTTTTCATTCTGTCTCTTATTTCCTTCACTTCATCTCTCATTTTCCCCGTATTCATTTCTTCTCGAACTTCCATCAACTTCCAAATATGTTCAGGTGGCAGATCATCATGGCAGTCGTCTGCCTCTCGTTGGCACCAGCCCTCTCTCAGATCACCTTCTCCAGGTCTTGGGTGCCCCAAGGGAAGAGATCTGCTGGCACTGTAGTGCCAGGATCTCCTGCAGTAGCAGCAGCAGGAGAAGTTGACGGTGGTCTTGGCGATGCCTTTTGCCTCGAGGCACGACTGATGGCTCTCTCGGAAGTTGGTGCTCATATCGCTGAGCTAATGGATGAAACAAGCAAGGCTGAAGCTTCTCTCGCCCTACGACTGAAACATTCCCTTATGG…
ACP2	14.58	8.26	GGTTTTAGTTCATGCGTTTGATTTCATTTTTCAAGTAACAATTTTGGAAATACGGGAAAAATAAAACAATGCTTTAGGAAGAGAATGAATGTGCAGAGTAATCTTAACAAAAATATTCTTTTTGATAAGTTTTACATATCGGAATGCTGTATGGAATGAAAATATATTTCTTTACATATTTGTTGACAAGAGAAAGGAATATTGGAAGGTTTACAGTTTTATTTATTTTTCTATTATCATTCTAAACTAACAAAGATGAGAAAGTGGCTTCAACACTGCTGTCTTTCTCTCCAAAAGCGACCATTTAGCGTTTGGCCGCCAGTTGCGTTCAATAGAAGAACGGGAGAGAAGAAAACAAAAAGGGAGGGTTTTTGGGGGGTTAACGGTGCGCGCCCTCAG…
Agatoxin-like peptide	108.28	25.96	ACTCACTCTCTAGACACCAGCAAGGCACCACCTATTCACCAACATCTCCCGCCTCCTCTCTCGCAACACCCAGCAGCTACACCAACAGCAACAACATGGGCAGCAAGGTGTTAGTGATGGTACTTGCCTTCTTCCTTGTGCTGAGCATCGCTATGGCACAACCTCTGATTGAAGAAGATCACGAGGATGAGGTCGGCCAGCCGGACGCCGACTACACAGCTGATCTCCTTGAGAGACTTCTGGCACGGACATCTCAAAAACGAGATGATATGGGAGGCCCCATTAAGAGATGGCGTTCTTGCATCCCACGTGGAGGGTCCTGCACACACCGCCCCAAATCATGCTGCAACAGCTCTTCCTGCCGTTGCAACCTTTGGGGAACCAACTGCAGATGCCAAC…
AST-A1	1.2	0	GGAGTTGTAAACCCGGATTGTTTCACGGCTCTTATCTGTGTTCAGACACAGCTGTGTGCTTCGTAGTTTGGCAAAGTCTACTTCTAGTGAAAGGGTCGTCGAACTAGGATGGTGGTACGCCATGGTGGGATTAGGGCATATTCAATCGCAGCTTTCCTCTTGCTCCTAGGGGGATGCGTCAGGACACAAGAAGACTACTATGACAGCGACGTTGAAGAATTGTTGGAGGGAAATGACCTAGAGTTTCAACCACAGCCCAATTACGGTTGGGAATATGGCAAGCGACACAATGACTACGCCTTCGGTCTTGGAAAGAGAAGTCCCGGATATGCATTCGGCCTGGGAAAGAGAGACAGACTCTACTCCTTTGGGCTGGGCAAGAGAGAAAATCTCTATGCG…
AST-A2	7	1.79	AGACCTCAACATTATGCTTTTGGACTTGGGAAAAGAGACTCTGACATCGACTTGATAAAGAAGCCTCAGCACTACGCTTTTGGACTTGGAAAAAGAGATTTTGAAGATGACCTTGAGAAAAGAGCAAATTACGCTTTTGGTCTTGGAAAACGATATTCAGCAGAAGATGTTAACCGCATGTACGCTTTTGGACTTGGAAAGAGATCTGCAGAATACGACTTAATCGGTGAGGATGACCTTGTGGACGATGACGATGAATTTGATGATGATGATGATAGTGACATCGACGATCTTGATGAGGAAGATTTGGTAGAATATCAAGAACAATTGAAGAGAGCTGCATCCTATGGATTTGGTTTAGGTAAACGTGCTGGCCACTATGCCTTTGGTCTCGGCAAA…
AST-A3	0	0	TTACGCTTTTGGTCTTGGAAAACGTGACTCCGATTTGGAAAAGAGGCCTCAACACTATGCCTTTGGACTTGGAAAAAGAGATTTTAATTCATATTTAGATAAAAGACCCCAACATTATGCCTTTGGGCTCGGCAAAAGAGAATCTAATCTTGACTTGGGAAAAAGACCTCAGCATTATGCCTTTGGGCTTGGAAAGAGGGAATCTGACTCTGATTTAGAAAAAAGACCTCAACA
AST-B	9.79	0.41	CGCAGGCACGAGCAACCGCGTCGCTGGCTACCATCTCCTGATTCCACACGTAGTGAAAAAAAAATGATGCAGCAGCATGCACTCAGAAACGCCTCCTTGCTCGCGCTCATGGTGATTGCAGTCACTCAACTCACAACGGCATTGGATCCCGTTCCCGAAACGCCCCACACCGAAGTCAAACGAGCTGATTGGTCCTCCATGAGGGGCACCTGGGGCAAACGGAGTGACGGAGATGCCGTGGCACTTGAGGAACCAGACGACAAACGATCAGGCTGGAATAAATTCCAGGGCTCCTGGGGAAAACGAAGCGATGAAATGACCGACGCCGAACTGCAGATGGCGGAGGACAAACGCGCCAATTGGAATAAGTTCCAAGGATCGTGGGGCAAGCGAGATGGT…
AST-C	5.81	6.99	TTCTCCTCCTCTTCTTCCTCCTCTCCCACCTCCGACCACTCGCCCTCGCCCTCGATCAACACCCATACCCAGCGGATTCAGAAGAGAACTGTCGGCAAAGAGCCCAGCCCTGAGGAACTAGCTGTGTTAAAAGACCTCATTCTGAGTCGCGTGGCCTCTGAACTGAGCGAAAACCTTCGGGAGCAACAGCCTCTGGCCAAGAGGGTAAAGGAGGAGAGTGAGAGGCAGAAGGAGGCTGAAGAGGAGGCGAAGGAGGCGGAGGAGAAGGAGGCTATGCTGGCCGAGGCCAAAGCCAAGAGGATGTTCGGAGGATCTCCCCTCTCTGGCCTACCAGGGGAACTGCCCACCATGAAGAGGCAAATACGCTATCATCAGTGTTACTTCAACCCCATTTCATGC…
AST-CC	6.35	1.59	GTGTGTGCGTGTGTGTGTGCATGTGTCTGTGTGTGTATATGTGTCTGGTTGTTTTCCATTTCTAAACTCTTGCCTGCGCTTTTCATCTTTGGAGAAAAACATAACTTAGTGACCTTGAAATAGCACTATACGACGTAGGTTCAGATTCTTAAGAAGCTATAGTTATTTTCCCAAGCAACGCCACAAACATCACAATTAGATGATAATGCGAAAGCTGGCAACCTTCTGACCAATCAGGAAGTTTTAGGTGTGTTACGTCACAGACACCGGCCCCTCACGATTGGTTAGGCAGGTAGTCCCCTGACGGACGCCGGAGAAGGTAGGTTGTTGTCTGTATATATACATGACAATGGCAAACAACACATAGATGCACAGGAATCTAGAATCCATATCAGTGAG…
AST-CCC	21.91	4.49	GTAACCCGTTGGCGTCTACAGGCGAGAGTCTTGTTGTCCGCAGCAGAACACACAGACCCATTCCTGCTACCATCGCCTATACCATCTCTCTCCTTCTCTCTCTCTCTCGTACAACTCTCATCTAAGAACCAGATAAGATCATGGTAGCAAGAAGCTCAGTGGCTTTTGTTTTGGTGGCCCTGATGGCGGTGTTGGCCATGACCAGCGTAGAAGCTAAGGCCATTCCTGACCGAGAACCTCAGGGTTATGCCCAAGGACAACAATTGATGGATTTACAGCTGCCATATGGAAATCACCTGGTTGACGACGACGGGTCACTGGACACGGCGCTTATTAACTATCTCTTCGCCAAGGTCATGGTAGACCGGTTGAGGAACAACGTCGACGTCAAGGACCTGC…
Bursicon hormone alpha subunit	5.52	0	GCACCATCCTCCGTCGAAATCGAGGGTGCCAATCACGAGAGGGCCCACCTCCGATCACGTAAGAACACCCTCTGGAGCCTGACCTGGTGCCCATCATCAGCATCACCTCCTTCCCCTTTGACGCCATGTCCTCGAGGAGGATGATCAGCATCATGGGCGTGGCCCTTACCCTCGTGGGCGTCCTGATGTCTGACATCGCATTCGCCGATGAGTGCTCCCTCACGCCCGTCATCCATATCCTGTCTTACCCAGGATGTAATTCAAAACCAATACCTTCCTTCGCTTGTCAAGGACGATGTACCTCTTATGTCCAGGTCTCCGGAAGTAAGATTTGGCAGACGGAGAGATCCTGCATGTGTTGTCAAGAGTCTGGAGAGAGAGAGGCTACAGTCACCCTAA…
Bursicon hormone beta subunit	8.53	1.87	CAGCACCAGGGAAACGACAACAAGATGTGGTCTTGGTGGACATGGATCGTCGTTTTTGTTATCGGCGTATGTCAGATGACACATGCCAAAGGGTATCGCTCTGAATGCGAGACTCTGCCATCGACCATCCACATTTCTAAAGAGGAATTTGATGAAGCCGGCCGTTTGATCCGGACGTGCGAGGAGGATCTGGCCGTTAACAAGTGTGAAGGATCCTGTCTTTCCAAAGTGCAACCTTCTGTTAATACTCCGTCAGGATTCCTCAAGGACTGTCGCTGTTGCCGAGAGACCCACCTGAGGTCACGGGAGGTCATCCTGACCCACTGTTACGACGTCGACGGCAATCGTCTGGTGGGAGGCAAGGGACAACTCTCCCTCAAGATGAGCGAACCCGCCGAT…
Calcitonin	2.76	0.06	CTCGCCCTCAACGGTACCACTCGCAGAACACCGAAGGGGCAATACCGAGCTCGTCCTCCAGCTTCCGCCTCAACACATCTCCATACTCCTCCTCCAACCGAGAGCGAGGTAGAGTTAAGTCTCTCCCAGCAACAAGTGATTTCACATTCAACAAGTGACGAGACGACTCGAAACCTGGTTTAAGTGTACGAAAAGAAAACAGGAAAAACACCAACTTCTTTTACCACTCAAGTTATAAAGTTATTAAATCACTCCACTTCCAAGTTAGATCCAGAGCAAACGCAAGAACCATGAGGCACGGATGCTGGTTAGCCTGTATCTCCATGATGGCCGTCGTGGCTACAGTCCTCTCAGCCCATGTGCAGCCGATCCCAGAGAGTGAATTGATGGAGATACCCG…
DH31	43.91	5.23	CACTGCCACTGCTGCAGGAAGACGTCTCGCGTCTCTGTCCGTACGACAAACGACATACACCTGCTGGGACCTAAGCAACGCACTTCCAAATCACACCCCACCAGGATAAAATCCCCCCCACCCCCCCACCACAGCATCACTTATCTCCCCCATTCAGCCGCCACCGGCCAAAGAGACGAGACTCATGAATAACTCGGCATTGGTGTTCATTTCTCTTGTTGCTGCCTTTTTCTTCGTGTCATCAGTCAACTCCGCCGCACTCAACAGAGAGACGCGGGCTGTCGTGGAAATCGATGACCCTGATTATGTCTTAGATCTCCTTACAAGGCTTGGACATTCCATCATCAGAGCAAATGAACTAGAAAAATTCGTGCGTTCCTCCGGCAGCGCTAAGCGAGG…
CCHamide	2.15	0.74	CTCTCTCTCTTTCCTCAACTTCCAGGATTCTCAACATAGTAATGAGTTCCCTCAAGACATATTCATTTCTACTCCTAATATTTCCCCTCGTCATCGTCTGCTCACCTGTCACTTCAGCTCGAAGGGTACCGAAAGGTGGCTGTCTTAACTATGGACATTCCTGTCTTGGAGCCCATGGCAAGCGAGCGAGCCCGTCGGCTATATCACCCTCCATGTTGGGTGTTCTCCTCGAGGCATTGAGCAGTCGACCTGGAGAGCTTGCTGTCCTTAGTCACTCAAGGGGGGATGCTGCAGTCGGCACAAACACACTCCATCGGGCAGTTAGCCACCATAACAGATACCCCAGCGCAAGGATCGTGAGTTCTCCCACTGCCCAAGAGGATGAGGAAGCCATGGCCA…
CRF-like DH44	21.34	0.41	GCAACAACAACAACAACAACAACCTCCCCTCTCTTTACTAGAAGACCTCCCTTCGCAGGACTTTACTCAAGACGATATCCAACAACTTTTGGCGCGACATCCTGACAACGCTCCGGCTGCATCCATTCCCTCACTTAACAGTTACGATGGCAGTGAGGGTCTGCCTTACGTGTACCGATTGCAGGAGGGTCTAGCCGGAGCTGGCTTACCCTCCTCAGGGTTAGCTAGTGACGTCACGAACCTTGATAACCCTGACTGGATGACCATTGATCCTCGCTATTATCTTCTGTCCCAGTACCTTGACCATCCTGAAGAGGCCACGGACAGCGACAGCGGTAGCAACAGTATGACCCCAGTCAGGAAGATAAGGGACAGTTCGAACCCCAGCAGCGTCAGTAG…
CCAP	16.89	6.4	AGGAGGAACTGACAAAGCTCTATTTCGTTTGAACACCGAGTCATATAGCGCTATTTCGATTTCGTCTAGAAATACAGTTTTGCAAATAGAGTCAAGAATAGAGATTACAGTACCTGTATTCTCTATTCTTATTTGGCTGTAAATCCTTCAAAAGAAATGCACAACTCGAGTCGTGGGTGCGTTCATTTAGACGCATCTTCGACAACAACACCTTTTAAAAACATAAACAAGTCAAATGGTAAACATGGCTACGTAGGTGCGTTCATAAATCTCTTAAAAATATCATCTCTTCATTTTTATTTCTTTTTTTGTGGGTTTATCGTCACCTATATATATATGAATAAAGTCATGATGAATGGATAATAATTGCTATAGTAAAAACAACGGTTGATATCACAA…
CFSH1a	0.99	0.09	CAAGAAACTCCAACATGGCTCCACATCGACCACCGAGCTCCACCTCCAGATTCTGCAGTAGCCTCACCCTAGTTGGCGCCGTCGTCCTCGCCTTAGCTCAGCAGCAGGGTGTCAAGAGTGACCTGGACCTTCCGGCTCCATACCCGAAGCCCTTCTTCCTGCGAGAGTGGGAGGAGGACGATCTCAGGGACTTCAAGTGGTCGGACGCACTTCGAAACTCCCTGAAGAGGAACAAGGACGGCGATGATGAGCTCGGAAACGACCCCTTACAGTACTTCTCCGAGGAGCAAGTCAACGCCGCCATGAAGGCCGAGTACAAGGTCGTCCCCCATCCGGTCGTCTACACATCTCAGATCCTTCGCGAGGGCGTCAACTGCTCCTCCATTAGGATGAACCTCC…
CFSH1b	1.42	0	TCTCTTCCTTGACATGGAACAACACCAGAGTCACTCGAAATCCCCTCTGAGGCTCTGCCTCATGGCCTCCTTCTGCCTTGCTGCCTTCCTCCTCCAAGAACCATCAGAGGCCACTTTGAATCTGCCTTCCTACCAGCTCGGTTCTGGGGGATGGGACGAGAATATCCCAAAGCACATCAAATGGAGAGCCGAGGCCATCCGTATTCTGAAACAAGACGAGCTCAGTACTGACAAACTCCAGTACTTCTCGGAGGATCAGGTCAACGAGGCCAGCAAGCTTGAGTATAAGGTCGTGCCTGAGCCCATCATGTACACCTCCCAGATCATCCACAAGGGAGTGAACTGCTCCTCCATTAGGACTGGCCTTCATAAAAACCACATTAGACCTGAACTCCAGCT…
CHH1	1.77	0.07	CTAATCCAGGAAGGTAGAACGATCCGATCTCTCTCTCTCTCGGTCTGTCAGTCCTTATATCATTTCCTCTGACGAATTCCACTTGTTGTTTTTGACCGTGTGGAACGATGGTGCCTAATAGCCTGATGTGGTCTGCTGTGTTCTTGGTTGGTTTAGCGTTCAGCTGGACCACCTCTGCGTCGGCTCGGTCTGCCGATGGACTGGCAAGAATAGAGCGTCTGTTGGCGTCCTCTGCTTCTGAGTCGTCGGAGCCGTCCACTGCCTTGGCGGTGCAAGAGGAGGACCAGGCCGTCAGCAAACGAGCTATTTTAGATCAGTCCTGCAAGGGAATCTACGATCGGGAACTCTTCAGGAAACTGGAGAAGGTCTGCGAGGACTGTTACAATCTGTATCGTAAAG…
CHH2	16.9	6.02	GGATCTCCCATTCAGTCCACACCAACCAGCATCCTACTCGGTTACCAGTGGCCACGGCATTTTAACCTCATCTCCCATTAATCACTTCCTTGTTAAAAGCTGAGGCTTATCTTTTTCTCAGTATTCTCAACAAAGTCAACAACAACAAATCAACAATGATCTGCAACGGCACGATGTGGTCCACCCTGATGGTTTTGGTATTGGTGTTGAGCTCCAACAGCAATCCAGCCATGGCTCGATCCGCCGAAGGACTGGCAAGGATTGAGAAGCTCTTGTCCTCTTCCTCATCAGCCTCTCCGTCAGTGCCTTCTCAACCGTCTTCTCCTCTGACGGCGGCGCTTACTCAGCGAGGTCACAGCCTCCCCAAAAGGGCCGTCCTAGACCAGTCTTGCAAGGGCA…
CHH3	0	0	CATGGCTCGATCCGCCGAAGGACTAGCGAGGATTGAGAAACTCTTGTCCTCTTCCTCTTCGTCAGCCTCTCCTTCAGTGCCTTCTCAGCCGTCTTCTCCTCTGACGATGGATTTCACTCAGGGAGATCACAGTCTTAGCAAAAGGGCCGTCCTCGACCATTCTTGCAAGGGCATCTTCGATCGGGAACTCTTCAAAAAGCTCGACCG
CHH4	1.73	0	GCCATCTCCTGTTCAAAGCACATAACAGCATCAGTGAGCATCATACTTATCTCCAGAGCGGCTGACTGACGTCCCTCTTTGGCCTCGTCTGTCTGTCTGTGCACTGTGACTAGTACCTCCGTTACTACTTCTTGCTGGCTTTTTTCTCCGTTACTGTTATTATCAGCTTTAGAAGAGACCAATCATCGATGACCTGCAACGGCCTGATGTGGTCCACCCTGATGGTGGTAATTTTGGTGTTGGGTTCCAACAACAACTCAGCCATGGCTCGATCCGCCGAGGGACTAGCGAGGATCGAGAAGCTTTTGTCCTCTTCCCCTTCCTCAGTCTCTCCTTTAGTGCCTTCTCCTCTAACGGAACACAGCCTCCGCAAGAGGACAGTCCTCGATCAGTCTTGTA…
CHH5	1.05	1.73	GATCTCTGGAAGGGGACAGACGACTTCCAATTCGCTTTTAAAGACTTTCTCTTCAGTTTACAAAACTCCTTCACTATGATCTCTGATAACATGCTGCGTACGACCTCTTCAGTTCTCGTTTTGGTTCTTGTCCTGAGTTCGCAAAGTCTCTTAGTGCAATCAGCCGAAGACCTTCGACCCATCCAGAAACTTTCGGCATCTTCTTCTTCTTCCCCTTCTGACGGACTGGGCTCCCTGGTGAAGGGTCACCCCATCGCCAAGAGATCCTACGGCATGTCCTGCAAAGGACCTGGATACAGCCCCGAGCTCTTCCAGCAGCTGAGCAAAGTCTGTGACGGATGTTACAATATGTATCGCCAATATGAGATCGACATCGAGTGCAGGAGAAACTGCTTTGGA…
CHH6	4.73	4.77	AGCTCCTCAGCATCTACAGAAGAAAGACCTGTTCCAACCACCTACTGATCTCTTCTTAAGAAATTTTCGCAATGTTCTCCTACTCTACGATGTGGATGTCAGTGGTCTTGGTGGGCTTCGTCCTGAGTTCAAACAGTATCTCTCTGGTTCAATCAGCAACAACCGTTAGGGACATCGACAACCTTTCAGACTCTTCCTCTTCATCCTCCTCAAGCTTAACATCTCCGGTTAAGGGCCACGGAATCACTAAGAGATCTTTAGGCAAGTCCTGCAAAGGCATGCACTTCGATATTGAACTATTCCAGAAATTAGACAAAGTCTGTGAGGTTTGCTACAACCTCTATCGCAGAGCCGACGTCGCCATTGAATGCAGGAGAAACTGTTTCGGAACAAGTGTCT…
MIH/GIH1	3.48	0.09	AGAGAGAGAGTGTGAGAGTGAGAGAGAACTGATTCATTGCAAGCATAAAACAAACCAAAATCATCTTTGCCTTACTGCCTTTAGGGGATCATCAAGCATAAAAATGGTTTTCAGCACAACTCCAAATTTCTCTGTACAGAGAGCTGTGGCTACAGCGATCTTGATCGTCAGCCTCCTCTTAGTCTCAGGGACATCAGCCAGATACCTAGACGACGAATGTCCCGGGGTGATGGGAAACCGAGATCTTTACGAGAAGGTGGCCAGGGTGTGTGATGATTGCTCTAACATCTTCCGTAAGAATGACGTTGGAGCTAGATGCAGGAAAGACTGTTTCTACAACGAAGACTTCCTTTGGTGCGTGTACGCCACTGAGCGCTATGACGACGTGGAACAGCTCAA…
MIH/GIH2	5.98	5.31	AAGAGGAGGAAGAAGAAGAAGAAGTAGACAGTCAAACTCTGCTTCGAGCTCTCCCCATTTCTCTCTGTCCATCTTTCTGTCCATCTCTCTGTCCCTTCAATCTTCTTTTTTTCCCATATCCAACAGACAGTAGAATCTTAATACCATCAGACTTATCACAAGTTTCGTTTTTACACCGTCTTTGTTGAACAATCCTTCAGTATGCCAGCTCAGCTTAGACAACGGGTCTCTCTAAGGAGTCTCACTTCTGTTTTGGTAACATTGGCCGTGTTTGGATTGCTGGTAGCGGATGAGACATCCGCCCGGTTTCTGGATGACGAGTGTAAAGGCGTAATGGGTAACCGGGACTTATACGAGAAGGTCGTTAGGATTTGCGATGATTGTGACAACATCTTCCGA…
CHH-MIH-like peptide	2.2	0.33	GAGGAAACAAGTAACCGTCTGGTGGCTGCTGCTGCTTGGTCACTTCGAAGTCACTTCTGGAAATTTCGATTGACGCTCGCTCACTCTCCACTGTTTTGACTTATGTCTCAGAGATCTTGCTGCCAGTCATCATACAGCCAGTTTATACTGGTTTTAGGTCTTCTCTTGTTGACCCAGAATGCAGCCGCGAACTACATCAGGCTTCGTCCTAATACCTACAAGGAATTCCAGTTTCTGAAGTGTCAAGGAGAATTCGACAAGGAGCAGTATTCCGCCCTCAATCGATTATGTGACGACTGTCATAACCTGTTCCGGGATCCTGAGGTTCTTTTAGAATGCAAGGCAGATTGCTTCCAGAACTCCCTCTTCCCAGCATGTGTCAGTGCACTGCTGCTGGAT…
ETH	13.31	0.75	GCTTTGGACGTCACTCCTCCACGGGACACCAAAGAAGGAACACGCAGCAGCTGACAGAGACTCAGAGCTTTAAGGACAAAACAAAAAAAAAAAGACAGTTTCCAAAAGCAGTGACTGATTATATAACCTCCTATAAAGGAAGACTAATCTGTAGAAGACTCAGCTAAAGACCCTGAAGACTCCCCAAGACCCCCTGTAGACTCTGAAGACTCAGATACCCGCACTATCGTTGGAATTTTGCATCTCTACAGACTCCCTTACTTCAACACTCAGCAGTCATGTCTTGGATGGTAGCAGTAGCAGTTCTGGCCACCATGGTCAGCCTAGCGCACAGCGATGCCGGCCACTTCTTTGCGGAAACCCCGAAACATCTGCCCAGAATCGGTCGTCGTGGTGATC…
EH	3.63	0.27	CTTGGATCAACACACCTCACCCTCCAAAAAGAACAAGAACAAGAACAATACCAAGAATAACAAGAACACCAAGAACAGCAAGAATAAGAACAAGATAATAAAACAGAAGAAGTGTGACTCTTTCCCTGTTAGTTGCAGATCTCTCTCTCTCTCTCTCTCTTCCCCTCCTCTTTCTATCTCTCTCTTTTTTTCTCTCTCTCTATCTCTCGGTCTCCTCACACGCCCCCCTTGTTACCGCCTTCGTCCACCACAAGCAATTCTTAATCTCATCACTCTCAGCTCATACATGTCGTTCAAGGCTCAGGTCCGCTTCGTGGCAGTGAGTGTGGTGTGTCTGATCGTGTTGGCCTCTCTCACGGAAGCAGCCTCCATCACAAGTATGTGCATAAGGAACTGTGG…
EFLamide	1.03	0	ACACACGCACGCACGCACGCACGCCCACATACATACATACATACCTTTCTTGTTTAAAGAGCTACTGCACCTGCGTAAAACACCTGTACTAACAACCCCCTCTCCCCCCAACACATTCAACTACTAAACCGTTCGTACATCGATTGAAAAGGGAGTGTGATGATAGCAGGGTGGCAATGTGTCCTGCCGAGTCTGATCCTATGCTGTACTCTATGCTCCACCCACCCGACGCTCCGGCAAGATGAGTCTAAAGCAGTGGTGGAGAAGAGGTCATCAGGATACCCATACGACCCGGTTCTCCACCTCTTCCTCGTGGCCATGTCAAACCCGAAGACCAACCAACAGTCACCTCAACTCCTCAACAGAGGCGTCAGAAGAATCGGTTCCGAATTCCTTGGG…
FLRFamide	2.54	0.37	CCCACCGCACAGATTCCTACTCTCACTCTCACTCGCGAATCTACGTGAGTGCGAACCACCTCCGGACTACTGACGCTCTCTCTCTCTCTCCCTTCAAGGGTCCCCAGCACCATGATGATCATCGCGGCTTGGATCTCCCTCGGCGCCCTGAGCTGCTGTACCTACGCCCTGGCGCCCCCAGTCGTCTCAGGTCTCGAACCACCCACGAGTGACTCCGGAAACAGCGAGAACTTATCTGTTCCCGATAAGAGAATCCTCAAATACCTTCTGCCCTCATCTCAGTCATGGGGAGAGAGCGGTGCCAATGCCCCTGTGCCCACTGGGCAAGAAGGATCCAAGAGAGGCTACGTGGATAGGAATTTCCTGAGATTCGGACGAAGTGAGGGCGAGAAGAGGGAC…
GPA2	0	0	TCTTACTTCGGCTGACTGAGAAAATAAGGAGCGTTGTGATGGTGAAGGTTTGGATCGTACTGGTGGCTTACCTCGTCGCCTCCTCGGCTGCCTTTCAGCACGCGTGGCAGACACCAGGCTGCCACAAAGTTGGGCACACGAGGAAAATTAGCATCCCCGAGTGCGTGGAGTTCGACATCACGACGAACGCCTGTCGTGGCTACTGCGAGTC
GPB5	2.38	0.08	GTGACCTTGGGTGCTGCTTGGCTCCTCGTGCTGGTGCTACTGATGCCCGTGGCGGCCATTGACCCCATCTCCACACTCGAGTGCCATAGACGACAATATACTTACAAGGTTCACAAAAGCGATGATGAGGGAAGGATGTGTTGGGACTACATCAACGTTATGAGCTGCTGGGGTAGATGCGACTCCAACGAGATCGCTGACTGGAAGTTCCCCTATAAGAGGTCTCACCACCCGGTCTGCATGCACGAAACAACGCAATTGACTGAGGTAACGCTACGGCATTGCGATGAAGACGCCAGTCCCGGGACGGAGCTCTACACGTTCCACGAGGCCACCAGGTGTTCCTGCTCAGTCTGCAAGTCTTCGGAGGCGTCCTGCGAGGGAATTCGATACCGAGGC…
Hyrg1	4.17	0.1	TAGGAGAGAGAGGCAGACGGAGACTTTGCTAAAAGACACACGGAACTTAATTAATCAGTAAATCGGTGCTTGAAAGAAGAAGAAAAGTAACAGAGGCAGTAAGAACAACCTCGGGTTTTCAGAGTACTTGGAGGAAATATGAATTTGCTTGGCTTCATCGTCGTCATCATGGCAGCCATCTTCGGGGTGAGCCAGGCTTACCCTGAACCAGCTGTGATCGTCGACGGAAGACCAAACATGATTCCAGATGGCTACATCCAAGCGCCCCGCTTCCATTACCGAGGATTCCAAAAGCCCATTCCCAAATATGACTGGTCCTAATTATCTCTTCCTTTGCTAAAAGAAAAGATGAGGGAAGTTATTCATGGCGATTGTGGATTAAACCAAGGAGTCTTGAGC…
Hyrg2	12.89	2.55	CTGAACCTAAATTGAGGCACCTCTGTGACCCGAAGGTAGTAGACACCTCCCTCCTGAGACCACAAACATCTTTTGGAGCATCATGAATGTGCTTGGTTTCATCGTGGTCATCCTGGCAGCCATCTTTGGGATCAGCCAGGCGCTCCCTGAAGCCGCCGTGATAGTTGAAGGGAGACCAAACAGGGCACCCGACGATGGCTACGTCCAGGCAGCACCGCCCCGATTCCATTACCGAGGATTCCAAAAGTTCGTCCCTAAATACGACTGGTCTTAATTGGCTTCCCTACTTACATTAAAGAGAAAAAGAGATGGGAGGCGAATGTGATGGTGGGTGGAGCAAGGACAAGCGAGGAGGAGGGGTAGAAAGAAAACGGGACACTAACTGATAGAAAACGAGCC…
IAG1	76.01	0	GGAGGGTCAAGACGAGGACGACATCCCCTCGCTTCATAATCGAGGTGCTTTCGACAAGTGTCGCCTGTCCTCTATTATTTTTCGACCCGGCCAACTAAAACTTCATTTGCCACAATTTTTTTGCTCTCTTCTTCTTCTCCTTCTTCGTCCAAAATGGAACCAGGACATCTAAGTGCGCTCCTACTCCTTCTGAGTTGCTCTGTACTCCTAATCTTGCTGCCTCATTCTACCTGCGGATACGAGATCAAATGTTTGGCCCATGACTTCGATTGCGGTAACCTCAGCGGAACATTGAGTCTTACCTGTAAGACCTACTACGATTATTACAGAGAACGACGCTCAGTAGATCTCGATCTGTCATCTCTGGAAAATTCACATTCACACAATGCTGGTGGGATT…
IAG2	3.35	0.24	ACCAGCTTATCTTCGACAAGTATCCTCTTCTCTTATCTTTTCTTCTTATCTATTCCTTATGTTCTTAAATCTTCTTGATGTGTTGACAAAATTTGAATATCCAGATAACCAAAGATTTAACAATATCCCCTAGAAACTTTCTGTTTAATTCATATAACCAAGAAATTCACCGTGAAAATGGGACCAGCATATCTAAGTATGGTTCTTCTTTTGAGTTCTTCGACATATCTAACGTTGCTTCCTCAAGAGACGTCAGGATATAATATCACTTGTCTAGCATTCGACTTTGATTGTGGGCAACTCGCGGATACCATGTCACTACTCTGCAAAGTCTACAGAAGTCATATTGATGAAAGAAGACGTCGCTCTGTAAATCAGTCTCAGCCATCTCCTTTGAGA…
Kinin1	4.87	0	AACTATGATAAAAGACAAGCCTTTAGTGCATGGGCTGGTAAAAGGAACAATGATTTTGACAAAAGACAGGGTTTCAGTGCATGGGCTGGTAAAAGAGATGACGATCTTGATAAACGACAGTCCTTCAGTGCATGGGCAGGAAAAAGGGATGATGATCTTACCAAACGACAGTCTTTTAGCGCATGGGCTGGTAAACGAGATGACGATCTTGACAAACGCCAGGCTTTCAATGCATGGGCTGGTAAAAGGGATGGTGATCTTGATAAACGTCAAGCTTTCAGCCCATGGGCTGGTAAAAGGAATGATGATCTTGACAAACGTCAGGCTTTCAATGCATGGGCTG
Kinin2	3.18	0	TCAATGCATGGGCTGGTAAAAGGGCTGACGATCTTGACAAAAGACAATCTTTTAGTGCGTGGGCTGGGAAAAGAGAGAGTGATCCAGAAAAACGACAAGCCTTTAATGCATGGGCTGGTAAAAGAGGCACGGAGGCTACTAAACGTCAATCATTTAGTGCATGGGCTGGTAAGAGAAATGACGATTTTGAAAAAAGACAAGCATTCAGCCCATGGGCAGGAAAGAGAGATTTAGAAAACCAACATGCTTTTAGCACTAGCTCTGCCACACAGACCAGACTAAATGAAAAGCGACAAGCCTTCAACGCATGGGCAGGGAAAAGATATGATGAAAACTTTAACAATGCAGACAATCACGATGAAACACTTCTAACCTTACACAATCTTAACAAACAGATAT…
Myosuppressin	23.93	4.82	TGCTGTTGCTGCTGCTGTTGCTGTGACTGTTGCTGCTGCTGCTGTTGCTGACCCCGACCTCTTCTGACACAATCAACAGGTTCATCCCGCTGAGGCGCGTCTCTCTCACTCGTTCCCATCCCAACTTACTCCTCTCACGCGCTCTCTCACACTCTCTCCCTTTCTCTCTCACTTTTTCTCTCTCTTTCCTTTGGTCGCCCTCGGACGGACGACTGAACAGGCCTTTTCTTCCTCACAAACTCCAAATCAACCAACACAAAACCACCAAAATGGTATTCGGCAGCTCTTTCTCCGCGTGGTGTTCCCTATTCGTCGTCAGTGTAGCTGTGGCGATGGCAGTGTTTGCGGGCGTGGGTGAGGCCATGCCACCACCCATCTGCACAGATCCAAAGCTACCTC…
Natalisin	2.01	0	AAATCCCTACTGGATATCTAGAGGAAAGAAAGAAGACTCAAATCTCTACTCATTAGTCAGTGATAAAGAACCAAGTGAAATCAATCCCTTTTGGGTGGCAAGAGGCAAAAGAGAGGGCGAAAGCAATCCTTACTGGATCGCCCGAGGAAAGAAGGAGCCGGAGACCGCACCCTACTGGGTTTCCAGAGGGAAGAGAACTAGCAATGATGCTAGTTCCTCCTTCTGGGTCTCACGAGGGAGGAAGAGCGATCCGAAGAACAGTGGTAAGGACGACCCCTCCTTCTGGATAGCAAGGGGTAGAAGGAAC
Neuroparsin1	54.73	34.86	AGAGGACTAAGGTAGTTGTGGTCAGGTTTGGTAGAGGGCTTTCCACTGTGGCATAAGAAAATATCTTTTAACACCAGGCCACTTGCCCCATATAGACCTGCAACCAACAACTACCGTACTTTTATCTAAGACCATCCATATAACAACAACAACAACAGCAGATTTTCCAACCAATTTTCAGAGCTCTTACTTCAAGATATCCTTCGACAACTGAAACTCTTTTTAAGAAATTGACAAGAAAAACAAAAACAACTACAAGATGAAGTCCTGCATTGTTTACATTATGTTGTCTGTCTTCTGTCTTCTCCTTCTTCTCCAGAACTCCGAAGGCGCACCCCGCTGCACTCAGCACGACCGTCCTCCAGCTGAGAAATGTGTTTATGGCACTGTCTTGGATTG…
Neuroparsin2	17.57	6.32	CTTTGGTGTTGCGAAGGGAACATAACCGTGCGACCCTCTCCTACCCTTAACCCTTTTTTTTCTGGAACGGATGTCGACGGGATAAACAACAAACATTCCCTCTTTTCTCTCTCTCCAGTTTTTCATCTTCGATTTCTTTATCCTCAATTTCGATGATCTGATATTTATTCGACTTCTTTACACTTTATTTTTCTTTTAATCCCATTTATTTAACGGAAAAAACAAACACGGCATCAACAATACAAAAGGTGTTTCCATCGCCAGGGTCAATTCTTACCCAACTCCAACTTTTTCTTCTTCTTCGAATTTCTCCTTAAGTCAGAATGGAAAAAATGTTATCAACGCGAACTCTCCTCGTCGTCAACATTCTCATCCTGGTTCTTATCGCCCTCATAAGCG…
Neuroparsin3	67.74	21.61	AAAGAAAAAAAAAAAGAAAAAAAATGAGGAATGTTATATAAAGTTTTCTATTGCACTTTTTGGGTTTCACTCACACCATGAAAATTGTAGTGCTAGGGAATAAATCTTCACAATGAATACAACCACCACTATATACGGTACAATTTTTTATGTTATTTACAAGAACCAGTAATTTCACCAAATAATTCTTTCTAGACAGAAGACCTGTTTCCAAAAGGTCATGAAAAATAAAACAAATACTAAATAATATGTAGGTCTTCCTATCTTGCAATAAAATAGGCCTAACAAAATTCTGTAGAATTTGTAACACAAACTAATCATAGAAAGGAAATTATTGGAATCGTAACTGAACACAACCGATGCATTACAGTACTTCACTGACTAAGTATTCCTAAATAA…
NPF1	14.87	14.66	TCTCTCTCTCTCTCTCTCATTTATATAGATAATCTCTTACGTTTACATTAAGGATTTAAGACAGTAAGTACTCTCGCATCCATAAGCATAATCATTAAAAATATTTCTTTCCTTCTCATTTATCTTTTTTTTCTTCTTTCTTTCTTCCCTCTCTCCTTTTATTGATCATTTGGCATCTCTCAAAGACGAATGAGAAAGAGAACGAGTGACGAAAACAATCCTTTTTTTTCCCACTCAGCGAATATCTGGGTTGAGGAGTCTCAGCGGCAGGCAGCCTCTAGGAAAAGAATAATCTAACACACTCGTCAATTGATTCTGTTGCAATCGCTCTTCATCAAAATGTTGCTTGTTGCGCGAAGTTATGCTTTTTATTATTTTAAGGTAACATGTGACTAGACT…
NPF2	5.03	0.92	AAAGAAAAAAAAAGAAAAAAAAAAGTCCCACCACCGCCATCACCAGCACCACCACCAACACACAGTAGTAGACACTCAAAGCCACCTACCTCTCCGCCTGTCGCCAGTTTCGTTTAAACCAGCCTCCTCAAACATCATCCTCATCATGTTCACGCGTGCGGGACAAGTGTGGGCTGCCCTCCTTGTAGGCGTGGTCGTCGTTAGCGTTATGCAGATGGGTGGAGTAGAAGGCAAACCCGACCCCACGCAACTGGCGGCTATGGCCGATGCCCTCAAGTATTTGCAAGAACTAGACAAATATTACTCCCAAGTGTCAAGGCCCAGCCCTCGCTCGGCGCCAGGCCCGGCCTCGCAGATCCAGGCTCTGGAAAAGACTTTAAAGTTCCTCCAGTTACAAGA…
Orcokinin	18.69	4.14	AGCCACCTTTGCCTCGAGGTCCTCCGCACCACCTCTCCTTCCAAACCAAATTCCTCTCTATCTCGTCTCACTGTTGCAGACGCGCCCCAACCTCGGCAAAATCTCCTCCTCCGGCGCCATGACAGTGCAAGCCTTCAGCGCCCTTCTCCTGACGTGTGCCCTGTTCTTCGTCGTTGCTTCTGCAAACCCAGTCAAGACTGCAACGAACGGTGCCACTGCAGCCCAGCATGATGCAGGCTACACAGATAACGCTCCAGTAAAGAGATTCGATTCATTCACAACTGGATTCGGACACAGCAAACGTAACTTTGACGAGATCGACAGGTCTGGCTTCGGCTTTAACAAGAGAAACTTCGACGAGATTGACCGATCCGGCTTCGGCTTCAACAAGCGTAACTT…
PDH1	51.69	101.2	CCTAGCCACCGCTCCCGACGCCCGTATCCGTCGTCCTCCTGCCCGCCCTCAAATTCAAACACCCTAAACAAAAATGCAAAGCGGTTTAGTTGCAGCCTTGGTGTTGATGGTGGCTGTTAGCACCATGATGACTTCCGCACAAGAAGAGCTGAAGTACCCTGAACGTCAGGTGGTCGCTGAGCTTGCAGCCCAAATCCTGAGGTTGGCCCGGGGGGGACCCTGGGGTACAGTCGCCGCTGCTGCAGGACCACACAAACGTAATTCTGAACTCATCAACTCCCTTCTGGGCCTTCCTAAGGTTATGAATGACGCGGGAAGGAGATAAATGCATTTCCACGAAATCAACATCTCACACACACACACCCAATGGCACCTCTACCCTAGATGTTAGTTTGTAGG…
PDH2	9.01	37.02	CTTCTTTATCCCCGAAAGCATATTCTCACCCACACCAAAATGCAGTCTAAAATTGTTGTTGTGGTCGCCCTTATGGTTGCTGTCGCATTCAGCTTAGCAGCAGCGCAACAATATGACCTATTAACTACCGAAAAACAGTTAGTCTCTGAGCTGGCAGCCCAGATCCTGCGTGTAACACATTTGCCTTGGACCGATGCATCTGCCCAGAAGCGTAACTCAGGGATGATCAACTCCCTCCTTGGCATTCCCAAAGTTATGACTGATGCCGGCAGGAAGTAGAGAGACTACTTTTCGACGATCATTGATTAAGCAGATAAGAATGGCTTGGTCGACCTGGGACAAGAGGATCATCGTTGAATTGTTCTATCTTCTGTGTCATATTTTGACCTTTAAAGTCCA…
Proctolin	13.34	6.29	AACTCGAATCGCAAACCTGCCACACACAGCGATATCAAACACCCTCATCTAAACTAAGAGAGAGAGAGAACATAATATCTATCCGAAATTACCACCACCACCCAAAGCGAGACGTCCTCCGAATCGCTGTAGAGAGGGAGAGAGATAGGGAGGTAACACATATACACACTCACACACACCCAACGACCGTCGAGTTAGCGCTGCAACAGCACAGCGTCCCAATTGGAAGCCAGACGTCGTACTGACTACAGGTCCCCTCTCTTCTACTTCCTTCCTTCCGCTCAGCTCTCTCGGCGTTCAACTCATTCACTCCCTCGCTCAGAGTCTGGAAGTTCGCAGCGAACGGATCCAGTCAACAAACACACACACACTCACTCATACTTGCAAATCTTCTTGGGA…
Pyrokinin	1.95	0.65	TATCATCCTGTTATCAAAACTAAGTAGTCTAACTTATGTACAAAAATAGTCTTATGTACTACGCGCTACAGGTTTAAAAAAAACATCCTACGTCTATCAGATTATTTAAATACTTTATCAAATAATTATGAGAAACAATATATATAAATCTAGCGATAAATCTGTTTTTACGATTGGTCTGAAATATAAGCAAGGAACTTTTCTATCCGTGTGATAATGCTGCTGCTCCTTATTACATCTTCATCATCCTCCTCCTCTTCTTCTTCTTCTCAACCTGAAGTCAACAGCAACAATGATGTTGATGTTGGCAGTTCCTGGTGGTGGTCGAAAGCCGCTATTCGCCGCTCTCCCTTCTCGCCACGACTTGGAAAGCGAGACGAAGCACATTATGGACTAGTT…
RPCH	22.19	1.97	ACTCACTCCCTTGTAGTAACAGGTCAACCTTGAGACCCAGCGGAGCCCGCAGCTGAGACCTCCCCCTCGACCTCCAAGCCTTCAAGCGCCACCGAAAAAACTTTTTTCTCCCCTCGGTCGAGCAACAACTGCAAAATAAACTCCGTAAATATGGTCCGCAGCGGAATCTCCTTGGTGTTGGCCGTCCTCGTGTTGGTATCCTGCGTCTCTGCCCAACTTAACTTCTCTCCCGGTTGGGGCAAGAGGGCAACCGTCACAGGAGGGGCAGGGAGTGAAGGAGGCGCTCAGATCCACTCGGCGTCGGGATTGGCACTACCCGCTGCGGCTTCTACCGTCGCAAGAGGAACTGCTGGAGACAACTGCGCCACTATTCCAATCTCAACTGTCATGCATATCTAC…
RYamide	2.33	0	TCTTCCCCATCCCAGAGCGAACTTCCCGAGATCAAGATCCGATCTTCCAGATTCATCGGTGGATCCCGTTATGGCAAGAGATCCGGAACAGCTATGGTTCCAGATGTGTCTTCCCTTGTTCCTTCTGTTTCCGAAGATGATTCAGAAGCACCAGCAACTCTCCTTGTGGGAGATTCCGTCGTCTGCCTGCTGATCGATCTTCCAGATATCTACAAATGCCTTAAGAAAACCGCAAATGAAGAATCAACAAACTAACTTCGTGTGGCGTCTACTGTGGCTGTGTGTATAGGGCCAGACCTTGTGGTTTTGTCAGTGTGTAAACCTTGTATTGATTCTCAGTCTCATCCTCTGCCAAAATGGTGTTGATTCTCAGTTTAACAACCACAAATATTACTTTTA…
sNPF	7.26	3.03	CTTCCACCACGCCCTTGAAAGGAAGCTCCACGCGTGTCGCTCGCTCTCGCCCGACTGGCACGTGTATCCACCGATCCCTCTCTTATATATATATATAAAAATTACACAATCCCACTGAATTATTTCTTTACATTTAACTACCTAAGTAGTTACACGACATTCGTCATCGGAATTAATCAACCTTTATCCTCGAAAAGAAAATAAATCTTAAGATCATGGGTGTCGGTGTTCTCAAATGGTGCGCGGCTGCCCTTTTCTGCTGCCTCATTCTGGCCCAAGTTGCCTCCTCCATGCCAGCAGAGCCTGATTATGATGCTTTAAACGACGTCTACGACTGGCTCTCCTCACACGGGGTTGAGAGAAGAGGACCACCCTCCATGAGGCTTCGATTTGGTAAGA…
SIFamide	96.77	49.77	CCGACCTATCTAGCCACTCGCTTCCAGAAGGCACACGCACGGATCACCTCCTCCCCGTAATATCTCCACGCTTAACCCCCCGAGAACTTCGGTAAAAAACACCTCAGACATGTCCGTACAGACCCGACTCGTTGTGGCCGTTGTGGTTGTCCTCGTCGTCCTGGCTGTCTTCACCGACCACGCCAGCGCCGGCTACAGGAAGCCTCCTTTCAACGGCTCCATCTTCGGCAAGCGATCTGGCGGTGATGCTCTCTACGAACCCGGTAAGGCCCTTGCCTCTGCTTGCCAGGTAGCAGTCGAAGCCTGCGCAGCCTGGTTCCCCGGTTCTGAGAAGAAGTGAGCTCCATGATGCGGAGCTGGCGAGGCGTGATCCCTCCCTCTGGGGATAGGCCAACAGTT…
Sulfakinin	6.35	3.18	ATAACGTTCGCCACCTTACGACAACAATAACGAATTCTACGATGCAGTCGGTAATGCGAACAACCTCACTGACCTGCGCAGCCCTGGTTGCCCTGGTAGCAGCAGCAGTCCTGGTGTCCGGAGAGGTGGCTGCGGCTTCGAAACCCTCACTCGCCCTCGCAAGACGATTGGCCCCAGCCATAAGACATAAGCTGGAAGGCGGCCATTTCTCACCAGCGCTGATGGAAGAAATAGTAGCTGACTTCGAGGACCCAGAACTCATGGACTTCTATGACGCCGAGAAACGTCAGTTCGACGAATACGGTCACATGAGATTTGGCAAAAGGGCTGGTGGAGATTACGACGATTACGGACATCTCCGATTTGGAAGGAGTCTCGGACAAAACAGACAGCTGCCGA…
Tachykinin	19.03	0.36	GGTCGCCCTCGACTAAGGTAGTGCTTGAGTACGCAGGGACCATCCACGGGACACACACCACCACCACACACGGCTCTCTCATACCTCTGATACATAAACTCCCTTCACTCAACAAATTCCACTTTTTACACTTTAATTCACTCTTTTTTTACACTAACCGCTGCTGCTGCCGACTGAGAGAGACTCCTCGAATCCACAAAAGAAACAACACTTAAAAAAAAAAAAAGTTCTTGGACCCAAAACTTGTTCTGCTCCGTTCGTCGCTTTTCTCTTCAGCTAAACAGGGATGATGAGAGCAGGAATATGTCTCGTGTTGATGGGCGTGTTGATGATGCTGGGCGTCGTAGCCAGCGTGGTGGATGCCCAAGAGCCCTCCGAGAGAGAACGAAGGGCGCCATC…
TAP	24.28	29.9	CCTGAATTGAAGTAGTTATCACCTGCTGGCACAGAATTCCACTCTGAAGAAAATTACAAGAAGAAGAAAGAAGAAGAGGAAGCCTCAACCATGAAGTGGTTCGCTTTGTTTCTGCTGATGGCGATGGTCTGCGTCTCCAGTCAAGAAGACATCTATAGCAAGAGTGAAGCTGAACAAATCGAAATTCTTGGACCTCTTCTCAAGAAACTTCTGATGCCGAGACCACGTCCCGTCTACCAGATCCACCAACTCCTGAGGGTCCACGTGGAAAAATGCTGCAACGCCCAGCCAGTAATGGATTGCTGTACGCCAGCCATGTGCTGCCAGCTCTCCTTAGACAGCTGCTGCAAGAAATAGTGAATGCAATTCACGCTGCAACATATATTTCTTCTTTAGTTT…
Trissin	2.39	0.06	GTGAAGTGTCATGTGGCTCCTGTGGCTTGGAGTGCCAGAAAGCATGTGGCACCAGGAATTTCAGAGCTTGTTGCTTCAACTTCCAGAGGCGAAGGAGATCTCAAGCGCCTTCTTCAAGTCATAGTTTGAAAGGTCTGGAGGACCCAGAGGCAGTCGACATCCACCTCGTCCTCAAATCTCCAGTAACAGCAGTAAGTAGGAGCCACGAGTCTCAACTCCCAAACATCATCAGGTTCATTTCACGACTTGCGGACGACTCCTTCAGAAGCCCTGTTCAGCTGAAGGACCTCCAGCTGTACCATCCTGCGATCCCTTCCTTCCTCCAGAGTTCCAGCGAAGACGAAGAAGAAGAGGAGGTGGAAGAGGAGGTCGAACTTGAGGAAAGGGATAATGGCCTCA…
Vasopressin	1.53	0.37	CCTTACTCCCACTCCTCCCCCGTGTGATCTGCTGTCAACATCTCTCGCTACTTCGCGGCAGGTATGCAGTTGAGCGTAGTGCTTGTGGTAATTTCGCTCATCATGGGATATGGAAACGCTTGTTTCATCACTAATTGCCCACCGGGTGGAAAGAGGTCAATGCCCTCCTCACATATTGGGCATACGAGAACATGCACATCCTGCGGACCAGGACTCCAAGGCAGGTGTATGGGACCTGAGATCTGCTGTGGCGAGGGCATCGGTTGTTTCCTGGGTACCCGAGAGGCCCAGATCTGCCGAACTGAGAACCTCATTCCAGTCACCTGCAATAATTCTGACCTCAAGACCTGTGGCGCGGCGAGGTCAGGTCGCTGTGCTTCTGAGGGTCTTTGTTGTACG…

## Sheet: GPCRs
Name	bp	aa	lack5'	lack3'	Complete	TM	Phylogenetic Analysis	TPM_MP	TPM_EP	GPCR seqeunces (bp)	GPCR seqeunces (aa)
A-family GPCRs
Lv-GPCR-A1	1297	357				6	AST-A receptor	1.58	0.38	CGGTGGCCGACCTGCTGTTCATCGTGTTCTGCGTGCCATTCACAGCTTCGGATTACATCTTGCCCTCGTGGCCTTTCGGTGGCATCTGGTGCCAGACTGTGCAGTACCTGACATACGTAACCGCCTACGCATCTGTGTACACACTTTTACTCCTCTCACTCGACAGATTCTTGGCAGTTGTTCACCCCATAGCTGCTCTCACAATCAGGACGGAACGCAATGCTCTGTACGCCATAGCAACCAGTTGGATTCTCATCCTGACTTCTTGCATTCCACTGTATTTGTGCCATGGCATTCAAAAGCAGAATTTCGAAGACGAGGTCTATCTCAACTGCGCCTTTCTCGACCAGGAATATAACCACATGGCCTTTCACATCGGCTTCATCACCACGATGTACT…	VADLLFIVFCVPFTASDYILPSWPFGGIWCQTVQYLTYVTAYASVYTLLLLSLDRFLAVVHPIAALTIRTERNALYAIATSWILILTSCIPLYLCHGIQKQNFEDEVYLNCAFLDQEYNHMAFHIGFITTMYFVPLTVIVVLYLMILNRLWYGGVSRSAESVRGKKRVTRMVVIVVVTFIVCWFPIQLVLLLKSLGLYEMTTFRIIMQIGAQVLAYINSCVNPILYAFLSDPFRKAFRKVISCGPQRRTMLNGRTDCEKSVESRPLNPRPSPQMLPLTNMVSSSHHLSPVPAQMQNNTTTTTTTSFTNGATRDDQMNNPRSHENLLEKAGPPHAVENNCSSGRASDASRSSCAMNCE
Lv-GPCR-A2	241	79				1	AST-A receptor	0	2.25	TTTGCAACGAAACTAATTACACAAAACTACCGCTCTGCAATAACCAAACAGGAAGCGATGCACCAGCCTTCGAGTATGCCTTCATCGTCGCTATCGTCGTCCCTATCATCTTCGGCATCATCGTCTTGGTCGGCTTCTTCGGCAACACCCTCGTCGTCATCGTCATTGTGGCTAATAAGCAGATGAGATCGACTACAAATTATCTCATTTTTAGCTTAGCGGTGGCCGACCTGCTGTTCAT	CNETNYTKLPLCNNQTGSDAPAFEYAFIVAIVVPIIFGIIVLVGFFGNTLVVIVIVANKQMRSTTNYLIFSLAVADLLF
Lv-GPCR-A3	259	85				2	CCAP receptor	0	4.52	CCACAACCAATGTCACCAACAACACGAACGTTGCTGGTCGATCCTACTATTTCTATGAGACAGAGCAGTTCACAGTACTATGGATCCTCTTCATCTCGATCGTGGTAGGGAACGTAGCTGTTATAGCAGCCCTGATGCTCTCCAAAACAAGAAAATCTCGAACCAACTTCTTCATAATGCACTTAGCCATGGCTGATTTATCAGTGGGTTTGATAAGCGTTCTAACAGACATCGTGTGGAAGAGTACTGTCTCGTGGCA	TTNVTNNTNVAGRSYYFYETEQFTVLWILFISIVVGNVAVIAALMLSKTRKSRTNFFIMHLAMADLSVGLISVLTDIVWKSTVSW
Lv-GPCR-A4	2102	448				7	FMRFamide receptor	2.32	0.93	CGGCGATGCCGACATTAGATTACATGACCAATCAACATTTTCTTCATCATGTTACAGAGGAACCTGGTTTAGAGACGACTGCTGTTGCCACAGCAGAAAACCAGACCTATCAAGCATCACTGGATGAGATGTGCTTTGTCACTTATAATAATGGCAATGCCATTGATACCTCGCCAAAACTCTTCAGATTTATTGTATATGGAATATTGCTCACTACTATAGGACTTCTGGGAATTGCAGGCAATCTCATATCAATCACCATACTCTCCAGGCCAAAGATGCGCTCCTCCATCAACTGCTGTTTGATCGGTCTTACTTCTTTCGATATGATAGTGACCAGCACATCCATTCTAATGTTTGGATTGCCTGAGATTGGGGAATACACAGAGACCATGTTAT…	MPTLDYMTNQHFLHHVTEEPGLETTAVATAENQTYQASLDEMCFVTYNNGNAIDTSPKLFRFIVYGILLTTIGLLGIAGNLISITILSRPKMRSSINCCLIGLTSFDMIVTSTSILMFGLPEIGEYTETMLWYADGLYQRVTPFIYPLGLIAQTGSVYLTVTVTVERYVAVCQPLRARYLCTYGRAKIYVLIVAIFSVLYNLPRFWEVSYKECNVDNTPLFVIVVPSALRLNPYYIQVYIMWMYLLIMYLVPFLSLMIFNSYIYKEVRAANHERQRLSRLQRKEIGLAVMLLVVVTVFFLCNVLAFILNVLELSNITIEELTITSNLLVTINSSVNFIIYCIFGQKFRRLFLKMFCSRILTSSAARQAMHVNNSVYGEPSRTFTNGGATETIRLTSWGG…
Lv-GPCR-A5	766	254				4	natalisin receptor	1.18	0.33	GGATGTCAAAGACCACGGCGAGAATCTTCATCTTGGTCATCTGGAGTTCTTCGATGTTGCTTGCTCTTCCCTGCATCCTCTACTCAGATACCGTCTCTGTAACGTACAAAAACAACGAGATCCGAAGAGGCTGCATCCTCAGGTGGCCGGATGGGCAAACCAGTAGTTCCAAGCACGAACACATATACAACATCGTCTTCTTCATCACGACGTATCTCCTGCCGATGCTAGTGATGCTGGCTTGTTACTTCATGATTGGGCGTGAGTTGTGGGGGAGCCGCACCATAGGTGAGATGACCGAGAGACAAGTCAACAGTATACGCTCCAAGAGACGGGTGGTGAAAATGTTCATCGTCATCGTAGCTGCCTTTGGTTTGTGTTGGTTGCCCCAGCAGGCCT…	MSKTTARIFILVIWSSSMLLALPCILYSDTVSVTYKNNEIRRGCILRWPDGQTSSSKHEHIYNIVFFITTYLLPMLVMLACYFMIGRELWGSRTIGEMTERQVNSIRSKRRVVKMFIVIVAAFGLCWLPQQAFFLYTYHNNQILDTANIQHIYLAFYWLAMANAMINPVIYYWMNARFRSYFRELVLHCVCLRWPRRNLSYEGSPEMERRHPQCDEHSSRSRSDTRQGLNGTLRTTPGSNNHLLVYSSRERLNA
Lv-GPCR-A6	217	71				1	natalisin receptor	6.8	0	TGGCAATGGCTGTCGGGGGGAATATTCTCGTTATGTGGATTATATTTGCTCATCGAAGAATGCAGACGGTCACAAACTATTTCCTGATGAACCTCAGTGCGGCTGATCTCTTCATGTCAGTTCTGAACTGTATGTTCAACTTTATTTACATGTTACATAGCGACTGGCCCTTCGGAGCTGTCTACTGCACCTTCAGTAACTTCATGGCCAACGTCAC	AMAVGGNILVMWIIFAHRRMQTVTNYFLMNLSAADLFMSVLNCMFNFIYMLHSDWPFGAVYCTFSNFMANV
Lv-GPCR-A7	538	133				1	NPF receptor	1.39	0.12	CTACGTTGGGTTCTTTCAAGAACCTGAATACTTCTATGTGTTGTTTGGTTCATGTCACGCCATCGCCATGAGTTCCGCTTGCATCAACCCAGTCCTCTATGGGTGGCTCAACACCAACCTAAGAGAAGAACTAAGGCAGGTCATCCCCAAATTACTCAGGAAGACTTGGTGTCCATTTTACAAACGCACCGCGGAGAATGCCACCAGCGTCGGCCGCCCTGTGGTAGAGAGCGTCTCCTTGCTCGTCTACAGACCTCGTAGGGATACCCTCAACGATTCCCCTGAAGATCCTAGTCCCAAAGATGTCGTTTCCATCGACAGAACGTCCAATCCACGAAACAAAGGTAGTCCCACGAAGATGGAGTCAGCATCAACAGATATACCCAACAGGGAAGATAC…	YVGFFQEPEYFYVLFGSCHAIAMSSACINPVLYGWLNTNLREELRQVIPKLLRKTWCPFYKRTAENATSVGRPVVESVSLLVYRPRRDTLNDSPEDPSPKDVVSIDRTSNPRNKGSPTKMESASTDIPNREDT
Lv-GPCR-A8	607	201				3	RYamide receptor	1.36	0.2	CATACACCTTAGTGGCAATCAGCATGGACCGTTACCTGGCCATAATCTACCCCCTGAGGCCTAGGATGACCAGATTACAAGCCAGACTCATCATCGGAGTGGTTTGGACGTTAGCTCTTTTAACCACCTTGCCCATTGCCATCTTCTCAGGACTGGATCCAACAGACAGCAGAATCTACCAGATGTACGAGAAAGAGGTCTGCATGGAGCTATGGCCCAACGACGACCTCAAGAAGTATTACACTATGGCTCTCATGATGCTGCAGTATTTTGTGCCTCTGCTCGTCATGATCTTCACCTATTCCAGAATTGCTTGGGAAGTTTGGGGATGCAAGAAACCTAAAGGGGCCAATAAAGGAGAGCAGACCCTGTCCGCGGTTCACAATCTCGACACCGGAA…	YTLVAISMDRYLAIIYPLRPRMTRLQARLIIGVVWTLALLTTLPIAIFSGLDPTDSRIYQMYEKEVCMELWPNDDLKKYYTMALMMLQYFVPLLVMIFTYSRIAWEVWGCKKPKGANKGEQTLSAVHNLDTGRRLLRKSTTDHSPAKMIKMTLTVVLVYSLCWLPFNLLIVIIDCYPEVVFWPHFHHLWFVFHWLAMSHTC
Lv-GPCR-A9	354	117				2	Moody & Tre	1.13	0	ATATAAAGAAGCAAGGACAATGGACTCTATTAACACCATCACAGTCGACGATGGAAGTGAGGATTCAGTACCACTCTTTGTCAACTACCCGCCAAATCTCATCCACTTGGCTTTCTTCTGTTGCATTCTCTTCATCGTCCTTGGAGTCCCAGGCAATCTCATCACCATCATTGCTCTCGTCAAAAGCAAAAAGGTCCACAATGCAACAGCCGTATTCATCATCAACTTGACGGCTTCTGACCTCCTGTTCTGTCTCTTCAACTTGCCGATGGCTGCCTCAATGTTCGGCAACCGAGCCTGGGTGCATACGAGGTTCCTCTGCTTGCTGTTCCCAATTCTTCGCTACGGACTGCT	YKEARTMDSINTITVDDGSEDSVPLFVNYPPNLIHLAFFCCILFIVLGVPGNLITIIALVKSKKVHNATAVFIINLTASDLLFCLFNLPMAASMFGNRAWVHTRFLCLLFPILRYGL
Lv-GPCR-A10	898	298				2	Moody & Tre	1.42	0.1	TGCTTGCTATCACAATCAACCGTTATGTTATGATTGCCCATCAAGGACTCTATAGAAAGTTGTATACAAAGACGTCCATAGCAATAATGGTGGCTGCAACTTGGATAGGTGCATTTGGAGCTTTGGTTCCAACACTCTTGGAAGTATGGGGGACTTTCGGTCTGGATCCAACGATTGGTTCATGTACAATTCTGCCAGATGCTGATGGCAACTCCCCCAAAGCATTCCTCTTCATCTTTGCATTCTTACTACCGTGTTTTGCTATCTGCGTCTGCTATGCCCGAATCTTCTGCATTGTTCATCGAGCTCATAAAAAAAGCCACGCCAACATGGGAGGACCAAGCCTTGCAAGCAGTACTCGCAACAGTAGGAACTTGTCGCCTCATTCCTACGAGGCTT…	LAITINRYVMIAHQGLYRKLYTKTSIAIMVAATWIGAFGALVPTLLEVWGTFGLDPTIGSCTILPDADGNSPKAFLFIFAFLLPCFAICVCYARIFCIVHRAHKKSHANMGGPSLASSTRNSRNLSPHSYEALRVQTNPGPDPDLQVQISPYPHSITADIYKPTEDRVEREIRNGMENVNSDAKYQLRYPAIQPGKAIFPGAIPHEKPEFTVLFQAPPPECIATLTPLDTVAEEEKSFSSAQMSLSSEPTTPTREFLTPKPSLERRSSTKSSKSSNVSFLRGTIRRTRTASLVSRQQT
Lv-GPCR-A11	461	153				3		1.75	0.18	CCCCACTTGAGGATGATTCACCCACCCTGGATACCTTGACCAGCATCGTCTACCAAGATGTGCTGCCAGTGCTGATTGCTCTGGCCATCTTGACAAACCTGATGAACGTCCTCATGCTGTGGAAGGTTCGTGTGCGTCAGAAACAGCAGAAGAGGCAAGACATGGCCACCACCTACTGCTACCTCATGTGGTTGGCCATCACAGACCTCTTGGCCTCCACTTCTCTGATCCCATCCCTGATTCACCTGGATCGATCTCAGCTCTCGTATGGTTGGGCATTCTATTACGCCCACCTGGAGATCCCAGTCATGAATGCCCTCACGAGTGCCAGCGTCTATATTGTCGTGGGCATGTCCGTCGATCGCTTCGTTGCCGTCTGCTTCCCCAGGAGGTACCAGA…	PLEDDSPTLDTLTSIVYQDVLPVLIALAILTNLMNVLMLWKVRVRQKQQKRQDMATTYCYLMWLAITDLLASTSLIPSLIHLDRSQLSYGWAFYYAHLEIPVMNALTSASVYIVVGMSVDRFVAVCFPRRYQSVSARRMAIFRIGLSLVVATL
Lv-GPCR-A12	2353	553				7		1.25	0.6	CAAATTAGCAGTGCTTCAGAAAATGAAAACAATAACAATCATATCAATAATGAGAAACAAAATTATCCGGAATGAAACCCAGTAGAGGAAAATAATACAAAAACCAGTAACTCAAACGGGAACGGATGTGACAAACTCAGAAAAGAACCAACGAGAAGGCAATCCAACATGGCCGCTCTGAACACCTCCAGCGTTTTCCCACAATTAGCGGGGAACGATTCGTCCTTCCCTTCGTCCTCTTCCTCCTCCCCCGAAACGAATGGTTCTTCCACCAACGCCTCCACAGTCATGGTGTCCCTATGGTCCTGCAACCATACAGGACCCCTCATCATGAACGAAAATTACCCTTATCCTATGCTAGTAGAAGCAGCAAGGACCCTGGATGTCTATGAAATACTG…	MAALNTSSVFPQLAGNDSSFPSSSSSSPETNGSSTNASTVMVSLWSCNHTGPLIMNENYPYPMLVEAARTLDVYEILQILAIAFVFAISVCGNLIIMIVVYVNSFLRSTINYYLVNLAVSDLLITLLCWPTITTQLTHPFYILGRPLCKMNVLTQTTCVTASVMTLSAVACDRLYAVMLPLRARSSAARPVTLILIIWVIAVILALPALLVRDVQVFQWDDLIEESCSDLSIRCSQKAQNIFRIYRILLTVALFFLPGIVMVMAYAVILLRLWCVKRPAMNMTSNSNAPPHPHIRAKRKIVKMTAMVLVAFLVCWSPLHILLFYDLICNGALPLWYDKVVFWAYFLGYCNSALNPLLYGGFSDNFRLGFRSLFKGRRSTCGMTSDHMQLPSTAMATSIS…
Lv-GPCR-A13	1180	392				5	ETH receptor	1.11	0.93	CCCGAGTCTATGTGCAAAGTGGTCCCGTACGTGGAGTACCTAGTGGCCCATGCTTCCCTCCTCATCATTCTGGCCATCAGCATTGAGAGATACAGAGTCATCTGCCATCCGCTTACAGCCGCTGTCAAATGCAGCAGAGCCAGAGCCATGTGCGCATGCGCATTCGTTTGGTTCATCGCCGCTGTTGTTACCAGTCCAGTAGTCATCCTGACGGAGTACACACAAGTACGCTACATAGATGATTCCTTAGTCCCGGTATGCTACACTTCCATCGTCAAGCTTTGGGCCAAGGTGTTTGTGGTTTCAGCCACTATGGGTCTTTTTTTCCTTCCTCTGCTTGTGCTAATCGTCCTTTATTGGAGGATCGCCCGACAGCTTCTCCTTGAAGATAAACAGCTG…	PESMCKVVPYVEYLVAHASLLIILAISIERYRVICHPLTAAVKCSRARAMCACAFVWFIAAVVTSPVVILTEYTQVRYIDDSLVPVCYTSIVKLWAKVFVVSATMGLFFLPLLVLIVLYWRIARQLLLEDKQLCKDKPNPNLQARKQVVVMLGTIVVVFFVCLLPYRVFCLWIIWTTLETEQSLGQEAYYNLLYAFRVLVYVNSAINPLLYNITSSKFRGAFYRLLSARRGGERTLSSSLHHTTSNTLTSSMTNKSCGSWKGQNFLVRCSYSYGKGEGEIRPLVEPHNLKSTSVTAASSWVNVNGAHINTPPTSSPASSPFLLRSLCSRDVVKEMESFV
Lv-GPCR-A14	796	265				5	Moody & Tre	1.79	0	GAGGTCTAGAGGCATTCCTCAAGTGAGAAGCAGCACATCGTCCCTTGAAGCAGCATGTCGGGTGGGGAGGCTCCAGACTGGGCTGTAGTATTGACTGCTATAGCTGCAATTGTTATCTCTATATTAGGATTTTTCGGTAACCTCTTAACCATCTTAGCATTACCATACTCAACCCGTCTAAGAAATGCAGCCACTTGGTTTGTGGTGAATTTGGCGGTGGTGGAAGGTCTCTTCTGCGTGACCATCCTTCCCATCTCAGCTGCTCATCTCTTCTCTCTCTACATCAGCAACAAGAAAATCTTCTCTTCTGACGGATGCAGCGTCTTCGTCTTCCTTCGTTATGTCATCATTCAAACGGAGCTCCTCTCCATAGCTGCCATTGCAGTTAACAGATGTCTT…	MSGGEAPDWAVVLTAIAAIVISILGFFGNLLTILALPYSTRLRNAATWFVVNLAVVEGLFCVTILPISAAHLFSLYISNKKIFSSDGCSVFVFLRYVIIQTELLSIAAIAVNRCLLIAVPRKYPKIFTTPKTIAAIIMIWIFSAALMLIPLLKVYGEFTYNDQTKECDFADSEETGGSGPRKLFLILGFMLPSIIIIASYSYIFYKARQSSAKVQSRSQSLLKNSINSTTENRPSRPAEGLRKRDIR
Lv-GPCR-A15	421	140				6	Moody & Tre	1.28	0.22	TTTCATCGCTCTTATGATTGCCTTTTGCTGGGTGTTTGCTTTCGTCATGTTGCTGCCAACTCTTCTCAGTAAATGGGGTCGTTTTGGCTTCGACCCCCGCCTCCAGACGTGCTCCATCATAGACGAGAACAACAAGGCCCCCAAGCAAGTCCTCTTCGGCCTCGGATTCTGTGTCCCTGCCATTATCATCGTCATCTGTTATTCCCTCATCTTCATCGTCATCCACAGGTCTGAGAAGCGCATGCGTCATCACAGTACCCGAGGTATGAACGGTGCCCACCATGCCCCAACTGGATCTGCTCTTCAGGGACATTCCAGGAGTCGCGCCAAGGTGGAGCGAGAGGCGAGGCGTAAGAGGAACGAATGGCGAATCACCAAGATGGTGCTGATTATCTTCAT…	FIALMIAFCWVFAFVMLLPTLLSKWGRFGFDPRLQTCSIIDENNKAPKQVLFGLGFCVPAIIIVICYSLIFIVIHRSEKRMRHHSTRGMNGAHHAPTGSALQGHSRSRAKVEREARRKRNEWRITKMVLIIFIAFLITYL
Lv-GPCR-A16	303	101				2	GPA2/GPB5 receptor	1.07	0	GTGCTGGTATCCTCTAAGTTTAGAATGACCGTGAGCAAGTTCTTGATGGTCAACCTCGCCCTAGCCGACCTCAGCATGGGCATCTACCTCCTCATCATTGCCTCAATGGACCTCCACACTATAGGCGTCTACTTCAACCACGCGATCGACTGGCAGAATGGACCGGGCTGCAAGGTAGCTGGCTTTCTGACAGTATTCGCATCCGAACTCTCAATCTTCACCCTGACTGTCATCACATCTGAGAGATGGTATGCCATCACTTACGCAATCCATCTCAACAAGAGGCTGAAGCTATCGATGGCA	VLVSSKFRMTVSKFLMVNLALADLSMGIYLLIIASMDLHTIGVYFNHAIDWQNGPGCKVAGFLTVFASELSIFTLTVITSERWYAITYAIHLNKRLKLSMA
Lv-GPCR-A17	689	229				4	GPA2/GPB5 receptor	1.4	0.08	GCTGAAGCTATCGATGGCAGCTAAGATTATGGTTGTTGGATGGATATACTCCATAACCATGGCTACTCTTCCTCTCGTTGGCATCTCGGGTTATAGTAAGACGAGCATCTGCCTACCGATGGAGACAGGTAACGCCCTGGCCCTAGCTTACTTGATCTCTCTCCTGCTGGTGAACGGATTAGCCTTCTTCGTGATCACCGCCTGCTACGCCTCCATGTACTGCTCCATCAGTAGACATGACGCCTCTGCGTCGCACTCTGATCTGACGGTGGCCAAAAGGATGGCACTACTAGTCTTCACTGACTTCGCCTGCTGGGCGCCTATTGCCTTCTTCGGGTTAACTGCCGTAGCAGGAATCCCTCTGATCAACGTGACCAGGGCCAAAATCCTTCTGGTGTT…	LKLSMAAKIMVVGWIYSITMATLPLVGISGYSKTSICLPMETGNALALAYLISLLLVNGLAFFVITACYASMYCSISRHDASASHSDLTVAKRMALLVFTDFACWAPIAFFGLTAVAGIPLINVTRAKILLVFFYPLNSCANPYLYAILTKQYRRDLFILLERYGFCTKRAMRYKGAYSSVNNTFPHNTVVNAPNHRNSTLTQITLCDLTRAARTSQQSNNGSLLGTMI
Lv-GPCR-A18	514	89				2	Moody & Tre	1.35	0	CCTCAGTGCACAAGACCGCCGTCTTCTCAAGATGATTCTGGTGATCTTTGTTTCCTTTGTATCCTGTTACTTACCCATCACGCTCGTCAAGATTTTCGGCAAAGACGACAACCCTCTCCTGAACATTCTAGGACTTCTGCTCATCTACCTGACAACCTGCATCAATCCAATCATCTACGTGGTCATGTCATCCGAGTACCGTCAAGCATATGTGAGTCTGTTGACATGCAAGCGTGACAATGTGGACATCTCTAACCGATCAGTGTCTTGAATGAAGTGGCTCTTACATATTGGAGTTTACAAAATAGTGTACAGTACAGTTTGTGGTAAATTTATTACAGAAAACTTTAGAAATCTCGATTTCTACTAATGCTCACCAGCATAACAGATTATTATCTG…	LSAQDRRLLKMILVIFVSFVSCYLPITLVKIFGKDDNPLLNILGLLLIYLTTCINPIIYVVMSSEYRQAYVSLLTCKRDNVDISNRSVS
Lv-GPCR-A19	1094	156				2	Moody & Tre	1.18	0.08	ACTGAGGAAGCGTGACATTCGGATTGCAAGGACCATTGGAGTGATTTTCCTTGTGTTCTTGTGCTGCTGCACTCCAGTCTCGGTTGCACATTATTTCTATAACAGATACCCCAATCCAACACTTTTGCTTCTGCTACATCCTGTATACTGGGCCCAATACTGTATCAACATATTCATCTATGTCTTCATGAATAAACAGTACAGAGATGCATATGTCAACTATATCTCCAGGTGGTGGCCCAACTTCAGAGAGATGAGCGTCAGGAAGTTCAAGTGGCGAGAAGAGGGTACCAGTTGTGACAGCCAGCGCCAGACTCGAGCCGCCACACCCAATAGCATTGTTCGATTTGCTGCAAGAAAAATCTCGAAATCTTCCAGTTTCAAATCGACTCAATCCCC…	LRKRDIRIARTIGVIFLVFLCCCTPVSVAHYFYNRYPNPTLLLLLHPVYWAQYCINIFIYVFMNKQYRDAYVNYISRWWPNFREMSVRKFKWREEGTSCDSQRQTRAATPNSIVRFAARKISKSSSFKSTQSPLAKSNNPKETQKEAIPEVEDTTL
Lv-GPCR-A20	796	265				5	Moody & Tre	1.79	0	GAGGTCTAGAGGCATTCCTCAAGTGAGAAGCAGCACATCGTCCCTTGAAGCAGCATGTCGGGTGGGGAGGCTCCAGACTGGGCTGTAGTATTGACTGCTATAGCTGCAATTGTTATCTCTATATTAGGATTTTTCGGTAACCTCTTAACCATCTTAGCATTACCATACTCAACCCGTCTAAGAAATGCAGCCACTTGGTTTGTGGTGAATTTGGCGGTGGTGGAAGGTCTCTTCTGCGTGACCATCCTTCCCATCTCAGCTGCTCATCTCTTCTCTCTCTACATCAGCAACAAGAAAATCTTCTCTTCTGACGGATGCAGCGTCTTCGTCTTCCTTCGTTATGTCATCATTCAAACGGAGCTCCTCTCCATAGCTGCCATTGCAGTTAACAGATGTCTT…	MSGGEAPDWAVVLTAIAAIVISILGFFGNLLTILALPYSTRLRNAATWFVVNLAVVEGLFCVTILPISAAHLFSLYISNKKIFSSDGCSVFVFLRYVIIQTELLSIAAIAVNRCLLIAVPRKYPKIFTTPKTIAAIIMIWIFSAALMLIPLLKVYGEFTYNDQTKECDFADSEETGGSGPRKLFLILGFMLPSIIIIASYSYIFYKARQSSAKVQSRSQSLLKNSINSTTENRPSRPAEGLRKRDIR
Lv-GPCR-A21	813	232				3		1.56	0.24	TGTCCCTTGTGGTGGCCACTTTGATCTATGTGCCCCACAGCTTCTACCAGAGGGTGGTCTGCAACAGCTCTGGAATGGGATGGACCTACCAGGGCTATGAGGTCCTGGTGGAGTCCTACGCTTGGCACATATGGGAGGTCATCGTGGAGTTATGTCACAGGATGGTCCCCGCCACCATCCTCGTCGTCCTCAATGTCTCCATAATTGTCACCTTCAGGAAGATGATGGTACAGAATAAGGCTCGGGCTGCTGCTAAGAAGCTGACGAACGATGCTAAGAACGAAGACACCGGGAGGACAAGGAGGGAAAAGAGGCTCGTCTATCTGCTTGTGGCCGTAGTTTGGACTTTCCTCCTGACCAATCTGCCGGCTGCAGGATTGGCTCTCAGCGACACAGCCG…	SLVVATLIYVPHSFYQRVVCNSSGMGWTYQGYEVLVESYAWHIWEVIVELCHRMVPATILVVLNVSIIVTFRKMMVQNKARAAAKKLTNDAKNEDTGRTRREKRLVYLLVAVVWTFLLTNLPAAGLALSDTAGATYGSLSYEIFRAVANCLEVLGFSLNFFLYFFFVNGMNEVFLEALQYFKNKLCCVASYAKVNNSSNSCSERIRGSPSRNNSEAVNL.LRIRVRTRVVGF
Lv-GPCR-A22	1186	298				7		0.97	0	GCCTTGAAGTGTATAAACATGTGTATTTATTCCGTTATAGTGTTCGTATTGGTAAACATGATAGGTGAATGTGAACACGTTTAGTTATTACGTCATAGTGATCGTATTTTTAAATGTGGTTTTGCTGCCAAACTAATTCCATAATACTTCATCGAATCAAGGTGGATTTCTCTCCTGGAATTATTGGTTCTAGCCTCTTCTAACAAATACTGTCCGAGGCATCCTTATTTTTTTTTATGTGTTAGCTTTTGTGGATTGGTCCTATTGAAGTCATTCCTGAGTAGATATCCAATGGCATTCATCTCATTAACATATGGAGACTCACCATCTCCACTATCAGCAGTGCTTGTGAGCTGCTTTGCATTTGTTGGTTTCATAGCTAATGGCTCGCTCATCTGG…	MAFISLTYGDSPSPLSAVLVSCFAFVGFIANGSLIWLVGRHSHLRTLHNFIIVSRSAVDMLGCLLATFDVVYFIMDSFPFGDIFCKIKYGLHSYVFTSEAILLHMCTNLYNSYPKENPSPTSQRKLFRASSILIFLLFIGMTVAFAFISRIDSFNILDTEYRYCDFYLGQFNTAFLMLILSCQTFSTLLMWLFIYLSFSNRNKQLVDNDRKFINLRRIMIKLVLVQMMFNLTVNVFYILSYLGLYISGVIFNLTHSLRFFVIAFNATIWLLCKEEFKYYVYKFCRRTTENGEITMNSA
Lv-GPCR-A23	1601	331				5	ITP receptor	1.67	1.33	GAAGGATATATACAGATGTTGGTAATGCTGGTAAGCGTGACGTCACTGGCAGTGATCAGTTGCGACCGGATGATCGGCGTCGTGTATCCGTTCCATCGACACTTAGTGACTTGGAAAGCGACTACCATCATCCTCTTCATCTGGATTGCCTCTGCTCTTATATCTGTTCCCTTCGCCATCTTCAGAGTTTACACTGTCCACGAGTGGAGAGACTTCACGGAGAGAACCTGCGAGGAGATCTCCCATAAGATTCATATCTGGTGGATCATCGACACTGTTGCTTTGATCTGGGTTCCCCTTTTCGTCATGTTGACCTCTTACACAGTCATCTTCGTCAAAATCAAGCGTTATACGTCATCAATTAAAGGTAGAGAGCATCCTGCCATCCTGCACCTGAAG…	EGYIQMLVMLVSVTSLAVISCDRMIGVVYPFHRHLVTWKATTIILFIWIASALISVPFAIFRVYTVHEWRDFTERTCEEISHKIHIWWIIDTVALIWVPLFVMLTSYTVIFVKIKRYTSSIKGREHPAILHLKKRVVRMMFVVVIVFIVCWTPFQFFQLIQGWISDEDDQLHKYKKLYCTLLTVSQYMIYVNAAVNPIIYGLFHQTFRKAFRVTFSCFFKHKSPFVLTPRDGIRGFVWSVKSRTCTRHSSSKASAGLERNRKFSIRSRGQGSDPFIEERKTYLPPSYHEETYVRNLQMRKNLLNSEGALGHLIREVIQEESTSDLDSERVL
Lv-GPCR-A24	344	114				2		4.4	0.85	CTGTATGTTAATGGAGAAAACTCTTGCCCATGGGTTGAAGACAGTGACGCATGTAAAGTGTCTGCTTTCCTCCGTTATATGAACGCCATCTCTGAGTGGATGACTATTGGACTCATGGCATTGGAAAGGTGCGTGTGCATCTATAAATACCGGGCACAAAGGAGCAAAAGCAAGTGGTTTACGCGAAACAAGACAGTAGCCTACTGCCTTCTCATATGGTTGTTTGGTGGGCTATGCCAGCTTCCAACGCTTTTTGGGAAATTCGGTGAGTTTGGCTACAACGAAGAATTCGTGAAATGCGATTTCAAAAATGAAAAGCACAGTGAGAGACCTAGACTGGTGTT	LYVNGENSCPWVEDSDACKVSAFLRYMNAISEWMTIGLMALERCVCIYKYRAQRSKSKWFTRNKTVAYCLLIWLFGGLCQLPTLFGKFGEFGYNEEFVKCDFKNEKHSERPRLV
Lv-GPCR-A25	557	185				3	ITP receptor	1.46	0	TGGCAGGACTTAACAGAGACAGTGTGTGGCGAGAGTTCCAAATTGAACCTGTGGTGGTTCCTCACAATCGTCATCCTAATATGGATACCAGTCGGTGTCATGATTATTTCATATACCTCCATTCTCATCTTTCTTAAGTGTTCGAAGTGGAGACCTAGGGTGAAAGAACACCCAGCCATCATACACTTGAAGAAGCGAGTAGTGAGGATGGTGTTCGTTATCGTCCTAGGATTCATTTTCTGTTGGGGACCTTTTCAGGGATGCTGGATGTTCTATTATACTCATACCTACAGAGGGCAGTACACCAGTCCACAGGCTGGCAAGGAGTATGAACTCTTCAACACCATCGCTCAGTATCTCCTCTATGTCAACCCAGCTGTTAATCCGATCGTCTACGGT…	WQDLTETVCGESSKLNLWWFLTIVILIWIPVGVMIISYTSILIFLKCSKWRPRVKEHPAIIHLKKRVVRMVFVIVLGFIFCWGPFQGCWMFYYTHTYRGQYTSPQAGKEYELFNTIAQYLLYVNPAVNPIVYGLMHQTFQRAFKITFSCFFHKKSSFVLRPGHGPHRYVWSLKSRSGVASDQNLE
Lv-GPCR-A26	336	111				2		2.07	0	TTTAGAAATTCCTGGTTGGGAAAGTGTGACCCTTGCTGTTATACAAGTAGGACTGTTGCTAGTGGGAGTGTTAGGAAACATATCTGTAGCAGTGTCAGTTTGGCGCCAAGGCTCAAGTCAACAGCAACAATTGGCTGCTCATCGCCACATTCTCCTCTTGTCCTTAGCATTTGCAGATCTCTTCGTCACGCTACTTTGTCTCCCAGCTGCGACCTTTGACCTGCTTTTCACATCGTGGACTGCCCCATCTATCTGCTGTTCCTTGTTATCTGCTGCACAAAGCTCAGCTCATGCTGCTTCCACTCTTTCACTGACTCTGCTGGCAGTGGATCGTTA	LEIPGWESVTLAVIQVGLLLVGVLGNISVAVSVWRQGSSQQQQLAAHRHILLLSLAFADLFVTLLCLPAATFDLLFTSWTAPSICCSLLSAAQSSAHAASTLSLTLLAVDR
Lv-GPCR-A27	688	299				4	Moody & Tre	1.72	0	ATATGTCTGTGGGTATACTCGGCCTTGCTTTGGCTACCGCTGGCCTTTGGTAGTCTGGAGTACATTCCTCAAGAGCTGATGGTATCTATATCAGATTCGTCGAAATCAAGATCACGCAAAGGATTCCACGTCTTCTTTACCTACATATTCCCAATTTTCATGACCAGCCTCTGTTACCTGGTGATGTACATGAAGGTAAAGCGCACACGACGCTTGACTAGAGCGCGTCGTACGAACGTCGTGGCTGTCACCGAAAACAACGTCATTCGTCAATGGGATAATCACGTGACTAAGACGATTTTCGTCATCTACACCGTCCTCCTCACGTGCAGCGTTCCTCACCTGACCATCCACGTCCTCCACCTATACACCAAATACAAGGAGTTCTGGCTCCTCCTC…	ICLWVYSALLWLPLAFGSLEYIPQELMVSISDSSKSRSRKGFHVFFTYIFPIFMTSLCYLVMYMKVKRTRRLTRARRTNVVAVTENNVIRQWDNHVTKTIFVIYTVLLTCSVPHLTIHVLHLYTKYKEFWLLLHVVFWLQFCVDPIVYLVFSRVYRRAAMECLSKLFPRLEFFQVNEEFPKSGGRSDTKNPNMVSSPACSKHLRPPIQKIEFSSEVHRDLLDPKNILNN
Lv-GPCR-A28	228	76				1		0	0	ATCAGCGTCGGCAGGTTTGTGGCCGTCATGTTCCCCCTCCGTGCCAGGACATCCCCTGACAGAGCCCACAGGGTCATCGCCGCTGTATGGATGACCTCTGCTTTGCTGGCATCCCCAACACTACTCTATAGACAGTATTACAGTATTCAGTGGGCCAACTACACTTCGTGGCAATGCGACGAGCTCTGGCCGTCGGTGGACCAGTACGATCCCAAGTTGGGTCATTGT	ISVGRFVAVMFPLRARTSPDRAHRVIAAVWMTSALLASPTLLYRQYYSIQWANYTSWQCDELWPSVDQYDPKLGHC
Lv-GPCR-A29	206	68				2	ITP receptor	0	0	GGTTATATTCAGATCCTAGTGATGGTAGTGAGTGCCACGTCCTTGTCGGTCATCAGTTGTGACCGGATGCTTGGCATCGTTCGTCCTTTCCACAGACATCTGAAGACGTGGCAAGCTGACCTCAGCATCGCCATCATCTGGGTACTGTCAGCTGTATTCGCTTTGCCCTTCATGCTCTATAGGGTATATACGGTCCGCGTGTGGCA	GYIQILVMVVSATSLSVISCDRMLGIVRPFHRHLKTWQADLSIAIIWVLSAVFALPFMLYRVYTVRVW
Lv-GPCR-A30	1095	210				1	ETH receptor	0.81	0.59	CTCCTTACTTCTGCCATCCTTTACACGGGACGCCATCTGGTGTGGCTCCAGGCACATCCAGACCACGTCTTCCTCGCTTACTTCACCAGGATGCATCTGACCGTCACTCTTTCCCTCTTTCTCATATTCATCCCAAAGTTGTGGTGTGCTGGAGGGAGCAGTGGAAGGGAGCTTCCCCGGAGGGCCTACTCGACGACGGAGGGATGCCAAGAACCGCGCTTGTGTGATGCTCTCACTAATGGAGATCTGGAGGCTTCCGACATTAATCTCAGTCAGATGGACCCCGAGGAAATAAGGGCCGAGTTGAAGAGAGTCTACACACAGCTGGAGGTTCTTCGGACTAAAACGATGAGGAAAGACAACCCTCACATTTCCAAGAGGAGAGGAGGTCGAAAGGCA…	LLTSAILYTGRHLVWLQAHPDHVFLAYFTRMHLTVTLSLFLIFIPKLWCAGGSSGRELPRRAYSTTEGCQEPRLCDALTNGDLEASDINLSQMDPEEIRAELKRVYTQLEVLRTKTMRKDNPHISKRRGGRKATHRRFSLQSRKGSREKSLHRHYPPRPLPHTLEGGEGEISKTPEESVCSIEGPSVLSVYTDGPSDLGTPSILHRSYKL
Lv-GPCR-A31	494	164				1	RYamide receptor	1.27	0	AAATGACCAGGAAGACAATATGCCACAGGAAAGCTAAAGTCTCTAAGTGTAATTATTGATGAGATGGGTGTATACCAAATATGAAAATAGATTCTTAATTGACATTAACCTTCGAAAATGATGGACAATATTAGTTTGGCCGAGATGGCCTCAGTGCACAACCAGTCAGAGACTCTTCAAGATCCTCTCAGCTATGACCAAATTCTGCAGAGATGCGACGAAATGCTGGGAGAGATACTCTTTTCCCCAAACGAAAGTTGGACTTTCCCCGAATACACCCACTGCGAAAGCTGCAATATTACCCCCGAGGAGCTGGACATCTTAGTTTCTGCTGGCGTGTGCACTCCGTCCGATTTCTCTTCGTATATGCCATTTATCTACCAGATGTACGCCTCGATA…	MMDNISLAEMASVHNQSETLQDPLSYDQILQRCDEMLGEILFSPNESWTFPEYTHCESCNITPEELDILVSAGVCTPSDFSSYMPFIYQMYASIFIVALLGNSLVIYTVVMSRKMHTVTNLFITN
Lv-GPCR-A32	202	66				2		0	0	TCGTGACCATATTCGTGACTGTGGTCGGTTCTGCGGGGAATATACTCACTCTTTGCACTCTGGCTCATCAGTTCTGGATGCCTAGAAGACGAAGATTCATCAAAATGATGACCGCGGATACGGTTCTCATCACCAACCTAGCCATCGCTGACCTTTTCTACAGCTCTATCAACCTGCCGTTCGTCTTCGCCACTTATTATAG	VTIFVTVVGSAGNILTLCTLAHQFWMPRRRRFIKMMTADTVLITNLAIADLFYSSINLPFVFATYY
Lv-GPCR-A33	358	119				1	CCHamide receptor	0.54	0	CAGCAGCACATCTTCAGTGGCACACACAAATGTGACATCTCAACCACAAAGTGTGTGCCTGTCCGTGGGGTGGGGTTCCGCAGGGGTGGATACAGGTGCCAATGCCACCCTTCCCATTATCTGCCCAATTCCACACATCAGTTCTTTAATGGCACCGAGGTTGAGTTGGCCTATTCGGAGAAACACAGAATCGACAGTTTCAGGTGTCAACCGTGCCCGGAGGGGTGTCAGAACTGTTCGACCCTGCTTGCTTGTTCCGTGCAATACGACGCCATGATGCGTTTGGTACCAGTGTGCGTGGAGGCTGCTTGTGTCTTCCTGTGCATCATCCTGGCTCTGGTGATCTTCAGGTTAAGAA
Lv-GPCR-A34	214	71				1		0	0	AGCAGAAGCAGACATGATGACAGAGACGTCAGGAAGATTGCAACAATGCTATTCGTGGTGGTGGTGTTATTTCTGATCTGCTGGTCTCCGTTACTTATCACAAACGTGCTGTGGTCCTGGGGATTCCTGCCCACCTATGATCACCAGTCTTTCAGCAAACACCTCTTCAACGCCGTCCATCTTCTTGCTTACTGCAACAGTTGCATAAACCCAG	SRSRHDDRDVRKIATMLFVVVVLFLICWSPLLITNVLWSWGFLPTYDHQSFSKHLFNAVHLLAYCNSCINP
B-family GPCRs
Lv-GPCR-B1	490	162				2	calcitonin-B receptor	1.29	0.61	CGCACTTCTTGAACGCGTCATCTCTTCTAGGTTCGGCTTCTGAAGATTGGTCTGGTTGCCCTGCCACCTGGGACGGATGGTCCTGCTTCTCTGAGACCAAGGCTGGAGAGACGGTCTCTTTCACCTGTCCCATACACGCCTACAAGGGACAACCTGAATGTGCTCTCGAAGGTCAGAAGACGTGTTGGCCCAACGGCACCTGGGCCAAGGATTCCCGAGGGATAGAGCAGACGGAATACGCCATGTGCAGCCACCGTCAATATCACCTCGTCAACTATTATTGGGAGATCTCGATGCATGCTGCCTCAATGGTCGCTCTGTCGCCTGCTCTCTTCATTCTTCCTTATTACAAATCTCTCCGGAAACAAAGGTTCATTCTCCACCTCAACTTGTTCTGGT…	HFLNASSLLGSASEDWSGCPATWDGWSCFSETKAGETVSFTCPIHAYKGQPECALEGQKTCWPNGTWAKDSRGIEQTEYAMCSHRQYHLVNYYWEISMHAASMVALSPALFILPYYKSLRKQRFILHLNLFWSLFFKAFFGLLDVALLRIPEYTETNTLMDD
Lv-GPCR-B2	557	116				1	PTH-like receptor	0.97	0	CTTAAAGCACTTTACCGCCTTGTTTCATTTATTAAACGTGATTATATTGTTTATATTAGAGAAGGAATTAAATATGTGCAGTGACAGCATGCGAATTGTTGAATAATTAGTGATTATTTGATAGAAAAAGAGAGAGACAGAGAACTAATATTTTCTCTATCACCTTTATACTTCATTTGGCTCGTCCTTATCAGGTGACGACCAATCATGGAAGGCTGGACCACCAAAGTTTGTCTTGCTTTGTTCCTGGTGATACAGGTGTATTCTCCAGGGGCATCAGGATGGGCGATCAAGCAGGCTTGGTCCTTCAAGAACGGACAGGAATGTCTCAGTTATTACGCCAATATGACCATTCAAGAAGGGTCATGGTGCCACGCCATGTGGGACGGCCTGCTGTGT…	MEGWTTKVCLALFLVIQVYSPGASGWAIKQAWSFKNGQECLSYYANMTIQEGSWCHAMWDGLLCWAPSPFNSVSLLPCPPTPNSSTDRTRTAQKRCSPEGRWSHAEVPSTASSPSP
Lv-GPCR-B3	497	165				3		0.83	0.15	ATATATTCTACAGTTTTCTTGCGGTATGTGGAACCCACTTTGATTCTGTGTATGATAGAACCTTGGTTTAGGGAGATGGGATTTGCCCTCTTCTACGGCGCCATTGTACTCAAACTGTATAGGAGTCTGGTGGACTACCGCACCAGGAAGGCGCACAGATACGTCATCCGTGATCGAGATTTACTCAAGTATTTGGCTGGACTTGTGGTCTTCATCATGGGTTACTTGGCTTCCTGGTCCGCCCTGACGGCGCACCTCGCCATGGAAGGTCACTCACATCTTGTGCAGGGCCGAACCAGTGAGGGTCTGGCCTTCAGCGTCTGCAAGAGTGTTTGGTGGGAATATGTCACAGAGACAGGTGAGCTGATCTTCATCATGTTTGGACTCTACCTGTCGTGG…	IYSTVFLRYVEPTLILCMIEPWFREMGFALFYGAIVLKLYRSLVDYRTRKAHRYVIRDRDLLKYLAGLVVFIMGYLASWSALTAHLAMEGHSHLVQGRTSEGLAFSVCKSVWWEYVTETGELIFIMFGLYLSWHLNKAAGSSGEPSELSERRALSIALILELLTS
Lv-GPCR-B4	545	181				5	calcitonin-B receptor	0.68	0.61	AAGTTCTTAGTCTTCCTGACGAAGGTCTTCGGCGTCGCCGTCTGGAGCTGGATGTTGGCCGAGAGCCTTTATCTTCATCGTCTCATTGTCGCCGCTTTCAAAGGGGGAGGAAAGACCTATGCCTACATCCTTGTTGGTTGGGTTCCTCCGATCATTTTGGGAGTGTGTTGGGCTATCAGCAGGGCCTTGCTGGAGGATTATCAGTGCTGGCTTGGTGACCAACACGGAGACTCGCAGCATCTTTATCTCATCACCGAATTGCCCAAACTCATTATTCTTGTGGCCAACACCATTCTCCTTGGCAACATGACCCGGGTCTTGGTGACTCAGATGAGGAGCGTAACGGATGATCTTTCCATCGCTAACAGGAGAGCTGTGAAGGCCACTATGTTTCTGCTT…	KFLVFLTKVFGVAVWSWMLAESLYLHRLIVAAFKGGGKTYAYILVGWVPPIILGVCWAISRALLEDYQCWLGDQHGDSQHLYLITELPKLIILVANTILLGNMTRVLVTQMRSVTDDLSIANRRAVKATMFLLPMFGLQFFITFVVPPYTTPCIGMHVYWFAATAVDGLQGLYVVVVYCYM
Lv-GPCR-B5	1518	383				6		0.88	0.57	ATTTGGTGCCACTGTCAACATCCTGAGCTTGTGGTGCTTGTGGAAATGCAGGAGGACGGGTCGTGCCATAAAGCTGCAGCTCGGCTTGGTCTTCGTGCTCCTATTGTTGATCAGCACCATCATCCTCCCAGGGGAAGGATGGATCAACTACCTCAGCTTCTATTGCAGAGATGATCAGATCAGTGATGCTGCTACTATCTTCTTCCTCCTTAGTTCAGGTTTTACATTGCAGCTGGAGAGGATGAACATCAGCAGTGTCGCCATCTACAGATTTATAGCAGTTCGGTTCCCTCAGCTCTATAAGAGGCTGACCCAAGTGAAGGTTGTACTGATCTTAGAGGTTATCATCAGTGCCTATATTGCAATACCCTACATCCTAGGATTTACACAAACGGTGGA…	FGATVNILSLWCLWKCRRTGRAIKLQLGLVFVLLLLISTIILPGEGWINYLSFYCRDDQISDAATIFFLLSSGFTLQLERMNISSVAIYRFIAVRFPQLYKRLTQVKVVLILEVIISAYIAIPYILGFTQTVEVVRFDNGNQYVKFGQKNTTIYKVIYKIYGYNFLIPFLITLVAYTLMVITVLYQKYKSKSMRKRDHVTFTLQFLILIDLLLDGPHAISHFIKAKRVTMTFFHMVFHLHLVVDPLIFLLLNPHNRRMLLELLRGYLPMGMAAYLPPPTASTNTHPKDSMQGMSSPTPKQRRKPQFNRQESNISQTSNSNSQRLQHVFTSAPSTNSGPKAAGETEKPLLSANCNPGADKQPVENEELMNVPLTPVDEVQKGFD
Lv-GPCR-B6	436	145				4		1.16	0.41	TCGTTCTTCATTGAGAACAACTCCAAACTTGTATATATTGAATAGAAGTGTGGTGAACATTATGAACAGCCTCTTGACACCACTATTAATTACGACTTTGATCAACGGTGGCTTCAAGTATGGCCCCGTGGCGTGTAAGTTGTCCGTGGCAGTAGGAGTTGTATCCATAATGATGGACGCTGCAATTTTCTCCTCGATGTGCATTGACTGTCACCTGGAGAGCCGGAAGAGAGGCCCATCTCCAAGGTCTCGTCTCGGAATGCTAAGAGCAGTTATAACGATAATCTGGCTGGCAGCTATTTTGCTCTGCGTACCTCTGTATATCTTCACCGGATACAGCTACCGAGAACCGTATGGAGGCAATTGTACCGAACGCTTGCTCTATTACATTCTTTATCC…	RSSLRTTPNLYILNRSVVNIMNSLLTPLLITTLINGGFKYGPVACKLSVAVGVVSIMMDAAIFSSMCIDCHLESRKRGPSPRSRLGMLRAVITIIWLAAILLCVPLYIFTGYSYREPYGGNCTERLLYYILYPYLFVLGVLMTFL

## Sheet: Lysmata wurdemanni peptides
Lwu_ACP1	MMAVVCLSLAPALSQITFSRSWVPQGKRSGTSAPASPVTAGGGAGETDAAGTGTGIGDALCLEARLTALSQVGAHVVELMDETSKAESTLALRLKNFLMARRRKMS
Lwu_ACP2	MHRWTVLLAIACLVFGPAMAQITFSRSWVPQGKRSAQAGSLLSSGDIADTCQEAKLTVLTQVANYVTRLMEETSDMGSDEASLAYHLRQAQIARRRRMA
Lwu_Agatoxin_like_peptide	MGSKVLVMVFAFFLVLSIAMAQPLIEEDHEDEVGQPDADYTADLLERLLARTSQKRDDMAGPIKRWRSCIPRGGSCTHRPKSCCNSSSCRCNLWGTNCRCQRMGLFQQLGK
Lwu_AST-A1	MLVRHGGIRAYSIAAFLLLLAACVKTQEDYYDDDVEELFEGNDLQFQPQPNYGWEYGKRHNDYVFGLGKRSPGYAFGLGKRDRLYSFGLGKRENLYAFGLGKKSGTYNFGLGKRSAREVVPGDFDNEQSMQFSSSSPSSSPSSPTPSSSSPPSSSVRTKREADSNEDVSEEKRKQYAFGLGKRGGEDDEKRSKSFSFGLGKRQDSEEEKRDRSYSFGLGKRDPDVDKKSKQQYAFGLGKREPGIESDTQEADLEKRRQNYAFGLGKRGEDVIDKRALQYAFGLGKREPSMLKRPRSYAFGLGKRGNDLDMEKKPEHYAFGLGKRGGEEDAEKRAQHYAFGLGKRGDEDVEKRE
Lwu_AST-A2	PYAFGLGKRTSPYAFGLGKRTSPYAFGLGKRTSPYAFGLGKRTSPYAFGLGKRDDSSSSSSGLGRRSGSYSFGLGKRVPGSYAFGLGKRETNDDDDQPQEPEPTGAS
Lwu_AST-A3	QHYAFGLGKRESDFDLEKRPQHYAFGLGKRDSDIDLEKKPQHYAFGLGKRDFEDDIEKRAHY
Lwu_AST-A4	SDIDLEKKPQHYAFGLGKRDFEDDIEKRAHYAFGLGKRYSADDANHMYAFGLGKRSGEYELITEDDLEDDEDDIDGDEDSDIDDLDEEDLVEYQEQLKRAASYGFGLGKRAGHYAFGLGKRGGSYAFGLGKRAPGYAFGLGKRPSDAYSFGLGKRPSSYQFGLGKRTGSYAFGLGKRAGSYAFGLGKRESPYAFGLGKKAGHYSFGLGKRSSPYAFGLGKRTSPYAFGLGKRTSPYAFGLGKRTSPYAFGLGKRTSPYAFGL
Lwu_AST-B	MMQHALRNASLLALMVIAVTQLTTALDPVPETSHTNVKRADWSSMRGTWGKRSDVDAVALEEPDDKRAGWNKFQGSWGKRSDEMTDSELQMAEDKRANWNKFQGSWGKRDGDFDGTEDKRGGWQNFQGSWGKRTADLMAADDKRGGWQNFQGSWGKRDDDLMDAEEKRANWNKFQGSWGKRNNWSSLQGSWGKRDIPAEILEELEKRGGWSSLQGSWGKRAWQNLHGAWGKRSGPADSTDDVVDDDEDEQEQEEEALQRALLSQVAIARLMSASPQKRGWTLWGKRPQYPARVAPRSANWSSLRGTWGKRSGDWSSLRGAWGKKNADWSQFKGSWGKRALGDEDASSQVA
Lwu_AST-C	MMSSAALLLVATLALAAVITHAQPLSSSSDSSSSSSAHAPSTSTHTQRIQKRTISKDPSPEELAVLKDLILSRVASELSENLREQQPLAKRVKEESERQKEAEEEEAKEAAEKEAMLAEAKAKRMFGGSPLSGLPGELPTMKRQIRYHQCYFNPISCFRRK
Lwu_AST-CC	GRSNVPHYGRGSRPCYPSNSNSSSSSFSPSQSHSIPLLLLLLLGLLLPFVMPAAAAVPHVAPQRPMYIEAIRPVLTNSAMPPSAPQQVVLQQIPDNVPPPRKRAAIVLDKLMFALQKALDDTPNSTPPGPQQDFPRNRAFAAGPMDLQRRGNNNDGRLYWRCYFNAVSCF
Lwu_AST-CCC	MVARSSVALLLVALMTVLAITSVAAKAIPDREPQGYGQGQQLMDPYGNHLVDDDGSLDTALINYLFAKVMVDRLRNNVDVKDLQRKRSYWKQCAFNAVSCFGKRK
Lwu_Calcitonin	MRYGCWLACFSMLAVVATVLSAHVQPIPESDMMEIPERLRELLLVRKLISSLNAAEAIPELQSRPAQTIRKRTCYINAGLSHGCDYKDLVGAMAEKNYWDSLNSPGRRRRSLEHHYSSSSSSSSSSSPSSSSSSSSSLYPSSS
Lwu_CCAP	MSHHQSISGRTVMLLAAVFLLLVAVLQATTASPVAKRDIGGLLDGKDKRPFCNAFTGCGKKRSDASVEALASGAELDDLAKHVLTEAKLWEQLQNKMEVMRSLAARMDDHPLYRRKRSPAPESRQQQITASSQQQQQQQQKTENQ
Lwu_CCHamide	MMSSLKTYSFLLLIFPLVIVCSPVTSARRVPKGGCLNYGHSCLGAHGKRASPPAISPSMLSILLEALSSNPAELAVLSHSSGDAGVGTDTLHRAVRYPSRKIVSAPAAQEDEDAMARAIMPDVLRNLLASQLNGRDVRARDGVDERSEADVVYPVNMEDYADDRIRRSAVGKVPVSKGGQKETGDEWEQEKEGGSNRREQNNNRNLRYETWLRR
Lwu_CFSH1a	MAPHRPSSSTSRLYSSLTLVGAVVLALAQQHGVKSDLDLPAPYPKPFFLREWEEDDLRDFKWSEALRSSLKRNKDEELGNDPLQYFSEEQVNAAMKAEYKVVPHPVVYTSQILREGVNCSSIRMNLHRNHVKPELQLRPDWIHKSELIGDCPAHYVTKELPPMYSPAVILEAVC
Lwu_CFSH1b	CVPVSPHVPVWVRRGPNFHVLDVEEVTVACACVRRPSGEGNFVFAAAVQN
Lwu_CFSH2	EGASPKAEGDDSMLSLVLLLDKEEEEEGEGDGGKGKTLVASKEISKASVAAPPLSPFAKRSRALCPNQGQGRCRRGQVSMIPANQVRQDWEDDYASVPDVLIQFSQKQAEETACNDLSVQLFRVDLKEHYLEPVWVREIVHLGMCPSKLQTRNFGKDVFPSSIVETKCLCHNQPCSNLGGDFRCQAIRRPIRTWVRHMEKFMPMQEMVTVGCVCVQRTSPEGKYFEPALQS
Lwu_CHH1a	LAVAEEEEQQAVSKRAILDQSCKGIYDRELFKKLEKVCEDCYNLYRKAHVGVECRSNCYGNLIFRQCLDDLLMMDVVDEYIKKVQMVGK
Lwu_CHH1b	LPKRAVLDQSCKGIFDRELFKKLDRVCEDCYNLYRKPYVGIDCRSNCYGNLVFRQCLDDLLLVENLDEYVNAVQMVGK
Lwu_CHH1c	SPKGPSSTSLARASSTANSSRSWTGCAKTATTSTGSPTSESTAGETAFSPKPSTNVWSTSYSMKRSLGKFGTTSPSFELLRCLCRSNCYGNLVFRQCLDDLLLVENLDEYVNAVQMVGK
Lwu_CHH2	LPKRAVLDQSCKGIFDRELFKKLDRVCEDCYNLYRKPYVGIDCRRNCFLTKTFDQCVVDLLLDEKEFGEIRDHVAFI
Lwu_CHH3	SSLGPLGHDITKRNTRGASCKGINNRKLRKKLHKVCQDCYNLYREPIVEVECRKSCFSSYNFTMCVADLLLPVKEYDTYAKALSGRWD
Lwu_MIH/GIH1	MVFRTTQDFSVQRVLAAAILIVSLLLITGTSARYLDDECPGVMGNRDLYEKVVRVCDDCANIFRKNDVGARCRKNCFYNEDFLWCVYATERYDDVEQLNRWMSILKAGRK
Lwu_MIH/GIH2	MPAQLKQRLSLKSLTSVAVTMAIFGLLLVDQTSARFLDDECKGAMGNRDLYEKVVTICDDCANIFRMNNIGPKCRKNCFYNMDFLWCVYATERREDLDQLNRFMSILRAGKK
Lwu_CHH/MIH-like1	FILVLGLLLLTQNAAANYIRLRPNTYKEFQFLKCQGEFDKEQYSSLTRICDDCHNLFR
Lwu_CHH/MIH-like2	RKPELNKMIYTVSGRKPLAYSLVNDSSAVASLT
Lwu_CNMamide	QQQQQGRGGTGLLSSPSASSSSSSSSSSSGISKGAALTHLNFDEPKSKRVMCHFKICNLGRRRRARLTTPLQG
Lwu_Corazonin	MAGSKQLQISAVFLLVIVGLAAAQTFQYSRGWTNGRKRSDSSPGARRTAGEIMQQPLPVVSRLLANSAALQNGRSARTSQKQTIEDRLRNLETGMNTLLVTSSASIPPGGENEYFADN
Lwu_CRF_like_DH44	MTIDPRYYLLSQYLDHPEEATGSDSGSNSMSPVRKIRNSSNPSSVSSSSNSNFDNSNSKAKRTWPHGFSRRRNSGLSLSIDASMKVLREALYLEMARKKQRQQMLRARHNQALLTTIGKRDVQRQLQEQEQEEDHQHHLRAERI
Lwu_DH31	MNNSALVFVTLVAAFVFVSSVNSAALNRETRAVVEIEDPDYVLELLTRLGHSIIRANELEKFVRSSGSAKRGLDLGLGRGFSGSQAAKHLMGLAAANFAGGPGRRRRSSDDNTNSNVPQDLHLEENYAQDHAAVETPAGSTR
Lwu_EFLamide	MITGWQCVLPSLILCCTLCATHPTLQQDESKAVVEKRSSGYPYDPVLHYFLVAMSNPKAHQQSPQLLNRGVRRIGSEFLGKRSVENVEDHKDTPKCEDCNPEDADDLKKEQLSYTGQYDYDDGRKMTESSENGDQNTYDTPVKRNVRGFYGGPNRDGLKNFFSLLMSKKMGSEFLGKRMGSEFLGKRAMGSEFLGKRAMGSEFLGKRAMGSEFLGKRAMGSEFLGKRAMGSEFLGKRAMGSEFLGKRAMGSEFLGKRNYDLDLLRQSEQESKRAMGSEFLG
Lwu_EH	MSFKAQVRVLVVSVVCLVVLASLTQAASITSMCIRNCGQCKEMYGDYFHGQACAESCIMTQGVSIPDC
Lwu_Elevenin	MVSNTTTNTWRFHLCPAALLLLASFACLATHTQAVDCRKFVFAPVCRGIIAKRMVSEKRSSSRPESSNRQWNAQYDPVAADNEDESSLFAQSYDDMASMDPHSRQEMVVVRSGSDVVQVPAYVYGVIERSLQGQRKK
Lwu_FLRFamide	PPTSDSGNGDNLSVPDKRILKYLLPSSQSWGESGANAPMPTGQEGSKRGYVDRNFLRFGRSEGAKRDAGRNFLRFGRDGGEDYDDDDEYSSPALSADKRDRNFLRFGRDSGKNFLRFGRPDMEEEEFGLDGSPLAFGQGLKDELTEEDKRASHKNFLRFGRGNKNFLRFGRNYNKNFLRFGRSVDTQTSCDDCEEDNVNKHSATSSISSSSSSSSHGIENNNKHSQVDEAIPSEVVSSSAVSEERNIRRSKRSAPVYYASHSPASWAREFQPAEEEEEEEVDDAGLLDLQDVSKRNGYNRNFLRFGRDRNFLRFGKREPADASPVMVMAPVQYPRIIRASNRNFLRFG
Lwu_GPA2	NACRGYCESWSVPSAWQTLLYNPHQVITSIGQCCNIMETEDVKVKVMCIEGPRELIFKSAKTCACFHCKKY
Lwu_GPB5	MLTLGAAWLLVLVLLMPVAAIDPISTLECHRRQYTYKVHKSDDEGRMCWDYINVMSCWGRCDSNEIADWKFPYKRSHHPVCMHQTTQLTEVTLRHCDEDASPGTELYTFHE
Lwu_Insulin	THWGSSSGVSSSSSSSSSSSVPLSPPLKGVSTLNEEGEDLPLRRLCGWRLANKLNQVCKGVYNKPSPMSNDVFYRSLRVPDAHPRNFKSTYNDGGDFSLDETTNRLG
Lwu_Kinin1	AWAGKRGDDLDKRQAFSAWAGKRGDDLDKRQAFSAWAGKRGNNLDKRQAFSAWAGKRGDDLDKRQAFSAWAGKRGDDFDKRQAFNAWAGKRGDDLDKRQAFSAWAGKRSADLDKRQAFSAWAGKRSDDQEKRQSFSAWAGKRDNNHDKRQAFSAWAGKRSNDFDKRHSFSAWAGKRDDDFDKRQAFSAWAGKR
Lwu_Kinin2	NEKRQAFSAWAGKRHDENFNDAEKQDETLLSLHNFNKQIYDVPLRKDHSPEGHWSRNQATSNT
Lwu_Kinin3	GKRDDDFDKRQAFSAWAGKRDDYLNKRQSFSAWAGKRDNELDKGQSFSPVAGERDDTTDKRHSFSAWAGKRDDDPDKRQAFSAWAGKREDDLNKRQAFSPWAGKRDDDLDKRQAFSAWAGKRGDDLDKRQAFSAWAGKRG
Lwu_Kinin4	AWAGKRDENFDKRQAFSPWAGKRDLETQHTFSSSSDTQTRQNEKRQAFSAWAGKRGDDLDKRQSFSAWAGKRDSDPEKRQAFNAWAGKRGSEATKRQSFSAWAGKR
Lwu_Kinin5	LNEILKKRAAFNAWAGKRDSVSDKRQAFSPWAGKRDSSDKRQSFSAWAGKRSADLDKRQAF
Lwu_Kinin6	PTPDIELKRAAFSPWGGKRSDPTLSRTNINGVSFRPWGGKRSQLYPEELEESENAEKLLPYLSLIQTVGTPDSDEISQASRYWDENQFLSNNGPFNYYPADSNLPVSSPTPRRFKRDSATFSTYETKDNAKEETEATDLQDVKPQEEKRTKFSAWAGKRPDINLLREAVRRFVRNPPKGLKRRGFSAWAGKRSVHPEYSGLQDEYSGLQDKRAFSAWAGKRSLLEPTETSYSGKNDSFSQIQEESSSNAHNEDQKRASFSAWAGKRDQNVEDDEHTLDNFKPTLDTNNSNEILKKSAAFNAWAGKRDSVSDKRQAF
Lwu_Myosuppressin	MAFGSSSATCCSLLVVSAVVMISVFAGLGEAMPPPICTDPKLPLSPYAQKLCNALTNIAEFSRAMEEYLDAKVIKSSMPVNEPEVKRQDLDHVFLRFGRSQQ
Lwu_Natalisin1	WVARGKKEDDDKTNFWVARGKKEDDDKTNFWVARGKKDDGETPFWVARGKKDTDVTPFWVTRGKKDNDQTPYWIARGKKDNDETPYWIARGKKDNDQTPYWIARGKKDTDKTPYWVARGKKENDQTPFWVSRGKKDNDQTPFWVARGKKEDSNPYWISRGKKEDTNPYWISRGKKEDSNPYWISRGKKEDSHPLHSLVSDKELSETNPFWVARGKKDGESNPYWIARGKKEPETAPYWVSRGRRTGSDASFWVSRGRKSDPKDSSKDDAFWIARGRRNFWTARGKRPNSIHEKDLLMTYVMKALLEQQQQQQQQRQPSTTGD
Lwu_Natalisin2	QPFWVARGKKEDDDKTNFWVARGKKDDATPYWVARGKKEDGDKTNFWVARGKKEDDDKTNFWVARGKKDDATPYWVARGKKEDGDKTNFWV
Lwu_Natalisin3	DGIAEKDPEGEEEEEKEEDIWLPEGKDEDVEDADAYDEYYQDVTVSKRSPPYWISRGKKSISDYIPFYWGSNQNVWGKAPLRGKPMQPALREVSRSTKIPRSIFSSGWESNQSFWGKRDGGPFWLSRGRRDNTEPFWISRGKKEDPEVVGPYWIARGKRPLDNEDSSQASDPLQTGKTDQDKDDSARFSGSTGIQKKRADNGPFWISRGKKSPSKEPEQDKSPYWVARGRRGDNTTFWVARGKKDNSKSSSFWVARGKKELEEKSPFWIARGKKAGDQPFWVARGKKEDDDKTNFWVARGKKDDATPYWV
Lwu_Neuroparsin1	NEVCAKGPGESCGGHWWEMGKCGVGTFCSCGTCTGCSVITRACFRSALVC
Lwu_Neuroparsin2	MMISTRSLLVFNILILVLIALISQSCGAPHCSTVRHHEVNCTYGTYVDWCRNTVCAKGPGQTCGGEWWELGKCGEGTYCACGFCSGCSVNLECWFGTFC
Lwu_Neuroparsin3	MNHLRSALVMAFVAVILLSLTQFINGSPLCPSTRRIEEDLSKCEYGTVIGWCGNIECAKGPGERCGGNWLEHGSCGEGMYCGCGYCAGCYIVKCAPRMFC
Lwu_Neuroparsin4	MKIFSLVFCFTLLFTSCWGYCLTCFSPGNECFPPEGCSYGTVKDVCNCCDVCAKGPGDFCGGVWDTGKCAEGLFCNYRIRYNRPDGIPLSGVCTKIEPLKIKKLYPSTKEPRKAGFLFGR
Lwu_Neuroparsin5	YVEPRCLPEDHAKLEDCPHGLVTDICNCCNVCAKGPGEECGGPWDYIGKCGDGLVC
Lwu_Neuroparsin6	MKAVITLLCLVVLAKSIDGLTCGCLYVEPRCPPENHAKLEDCPHGLVTDVCGCCDVCAKGPGEECGGPWDLIGKCGDGLVCVPNPGETGSGPEGTCQ
Lwu_Neuroparsin7	MKSFTKVIVLCLSLVIMVASANSCEPCDKRACTPRDQLSCDWGVVSDSCKCCVLCAKGPGKRCGGNNNELGTCGVGLFCIHNIGSLEGTCQRQLLPVHPNPLGRRQ
Lwu_Neuroparsin8	MKSAVMILLCVSALLMMDSVNGYSCTCFGGCEHQPKEEDCPYGRTKDRCFCCLTCAKGPGEECGGLWNADGRCGEGYECVNASGDEDLYSYTGICQ
Lwu_Neuroparsin9	MKTFVVLVSLCLLIERSYGFSCPCHDDPIRICEGQPAEEECPYGRTGDVCGCCLVCAKGPGDRCGGDFFLDGHCGEGFKCVKIPGSPDNRGVYFRGICQ
Lwu_Neuroparsin10	MKVFGVLLCLVIFVQCCWGLSCPSCFDPPFECDPPPTGCSYGLAKDICGCCDVCAKGPGESCGGLWNELGSCTEGYKCVEKEHDINDPNFSIDDYKVGTCQ
Lwu_Neuroparsin11	MNSFTKVIALCLSLVIMAPSIDSQCGPCDRPSCTPEDQLSCEWGTTLDGCRCCYKCRKGPGEICGGVSHTLGNCASGLYCVVIDETTLEGKCRNITDLPHPYPEGGFQ
Lwu_NPF1	GMLSSAEVPYPSRPNVFKSPVELRQYLDALNAYYAIAGRPRFGKRGGSTPLRSTSQDDLFDY
Lwu_NPF2	MYTRAGQVWAALLVGVVVVGVMQMGGVEGKPDPTQLAAMADALKYLQELDKYYSQVSRPRFGKRSEYAVPPGDALMEASERLLETLARRR
Lwu_Orcokinin1	MTVQAFSALLLTCAVFFVVASANPVKTATNGATAAQHDPGYTDNAPVKRFDSFTTGFGHSKRNFDEIDRSGFGFNKRNFDEIDRSGFGFNKRNFDEIDRSGFGFNKRNFDEIDRSGFGFNKRNFDEIDRSGFGFNKR
Lwu_Orcokinin2	GFNKRNFDEIDRAGFGFYKRNNGLDKKNFDEIDRQGFGFAKRVFGPRDIANLYKRNFDE
Lwu_PDH1	GPWGTVAAAAGPHKRNSELINSLLGLPKVMNDAGRR
Lwu_PDH2	MQSKIIAVVALMVAVAFCLSAAQQSDLFTPERQLVSELAADILRVVHAPWTAAAAQKRNSGMINSLLGIPKVMTDAGRK
Lwu_PDH3	APWSAASAQKRNSGMINSLLGIPKVMTDAGKK
Lwu_PDH4	MQSGLVAALVVMVAVSTMMTSAQEELKYPERQVVAELAAQILRLARGGPW
Lwu_Proctolin	MARTVLVVLMAALVLVATVSEARYLPTRGDDSRLEEIRELLREILERTADGNSSSGSVNSRTAAAGFGYDKRYIYKRSVGGDNMAQAAAGVASAPGTLNGGERMTPLFNLAQ
Lwu_Pyrokinin1	RLGKRDEVHYGLVYDDDDDDEEDEFDSFEDGEDSSDVLDDLASQGYADEEVVSPQRLAVRSALVPRLGKKAVAFSPRLGKRVTAFIPRLGKRGDFAFSPRLGKRGDFAFSPRLGKKADFAFSPRLGKRGDFAFSPRLGKKADFAFSPRLGKRAPDFAFSPRLGKKSDFAFNPRLGKRGTAFIPRLGKRETGASTSASEDSWRTNANVVSQQLQ
Lwu_Pyrokinin2	MQAPNWIALVFICLTFAGCPSSSASLQNGGQGDLSKPSYSVSSKGAFLEALLSYLYHIYPSSNAVSSTNWNDQLDSADEFTQGTPKRLYYAPRAGKRSAPAYEDVDDEKQISEDTSKLNDGARWKRSAQEEETEEEKSRMKRDTSSSSNQPEINSNDDMDLGSSWWWSKAAVRRSPFSPRLGKRDEVHYGLVYDDDDDDEEDEFDSFEDG
Lwu_Relaxin	RRSPFISVQEANTFVSTWTRGRRLIHGRARRQSQSITSECCTTSGCTWEEYAEYCPTSSRVRPGIIPI
Lwu_RPCH	MVRSGISLVLAILVLVSCVSAQLNFSPGWGKRATVAGGAGSEGAGAQIHSASGLALPAAAGANVARGAGDNCATIPISTVMHIYRLIKREASRLVQCQEDEYLA
Lwu_RYamide	MNHSFIQLLTVFAAILSLTAAQGFYTQRYGKRGDARQVTVRSGFYTNRYGRSSPSQDDLPEIKIRSSRFIGGSRYGKRSGAAVVPDVSSLVPSASEDDSEAPAALLVGDSVVCLLIDVPDIYKCLKKPVNEESTN
Lwu_SIFamide	MSVQTRLVVAVVVVLVVLAVFTDHASAGYRKPPFNGSIFGKRSGGDALYEPGKALASACQVAVEACAAWFPGSEKK
Lwu_sNPF	MGVGVLKWCAAALFCCLILAQVASSMPAEPDYDALNDVYDWLSSHGVERRGPPSMRLRFGKRGNGIRSWQQVSQRSEPSLRLRYGKRTVTDEAEPLLDHELVRKDRTPALRLRFGKRTSDYGQDEPFGDTDFVRQDRAPALRLRFGKRTSD
Lwu_Sulfakinin	AVLVSGEVAAASKPSLALARRLAPAIRHKLEGGHVSPALMEEIVADFEDPELMDFYDAEKRQFDEYGHMRFGKRAGGDYDDYGHLRFGRSLGQNRQVPKRQ
Lwu_Tachykinin	MMRAGICLVMMGVLMMLGVVASVVEAQEPSERERRAPSGFLGMRGKKNDYLLQEDDYLMNDPIAARIEAAKSLPIRGKKAPSGFLGMRGKKSEEEVYGNDLADYELEALLKRAPSGFLGMRGKKAPSGFLGMRGKKAPSGFLGMRGKKMYDDDVEMDALIEALSAMAEGQHQKRAPSGFLGMRGKKSVYDDQSDGDDDLSAVDKRAPSGFLGMRG
Lwu_TAP	MKWFALFLLMAMVYVSNQQNIYDKSEAEQIQILGPLLKKLLMPRPRPIYQIHQLLRVHVEKCCNSTPVMSCCPPAMCCQM
Lwu_Trissin	PSHSLKGLDDPDAVDIHLVLKSPATADRSHESQLPNIIRFISRLADDSFRSPVQLRDVQMYHPATPAFLQGSSEEEDEEVELEGNGLPPPSQGVVEGRSLPFGEASPGGAVEADTLNRLVEMAYRHPSPPSSSSLIHRQIRQAQYPPSPSKIRK
Lwu_Vasopressin	HIGHTRTCTSCGPGLQGRCMGPEICCGEGIGCFLGTREAQICRTENLIPVTCNNSDLKTCGPSRSGRCASEGLCCTE
